# Supplementary material for: Graphical Modeling of Gene Expression in Monocytes Suggests Molecular Mechanisms Explaining Increased Atherosclerosis in Smokers
Source: PubMed Central journal article supplement (PMC3553098; doi:10.1371/journal.pone.0050888), 2013-01-23

## Supplementary Text S2

*Network plots for all ICA modules.*

*Verdugo et al.*

The following graphs represent network skeletons for each ICA module estimated by the PC-algorithm applied to 1000 data bootstraps (see Methods in main text). Edges among variables are drawn if detected in at least 60% of data resamples. The recovery percentages are indicated to the right of the medial section of each edge. Line thickness is proportional to the edge's partial correlation. Black edges denote positive and pink edges negative partial correlations. Plaques and risk factors are in blue. Genes directly connected to smoking are in green and those directly connected to plaques are in orange. Other genes are in gray. Only genes that are involved in the shortest paths connecting smoking to plaques are shown. Genes connected to both smoking and plaques are in red.

# Network Skeleton for Pattern 4

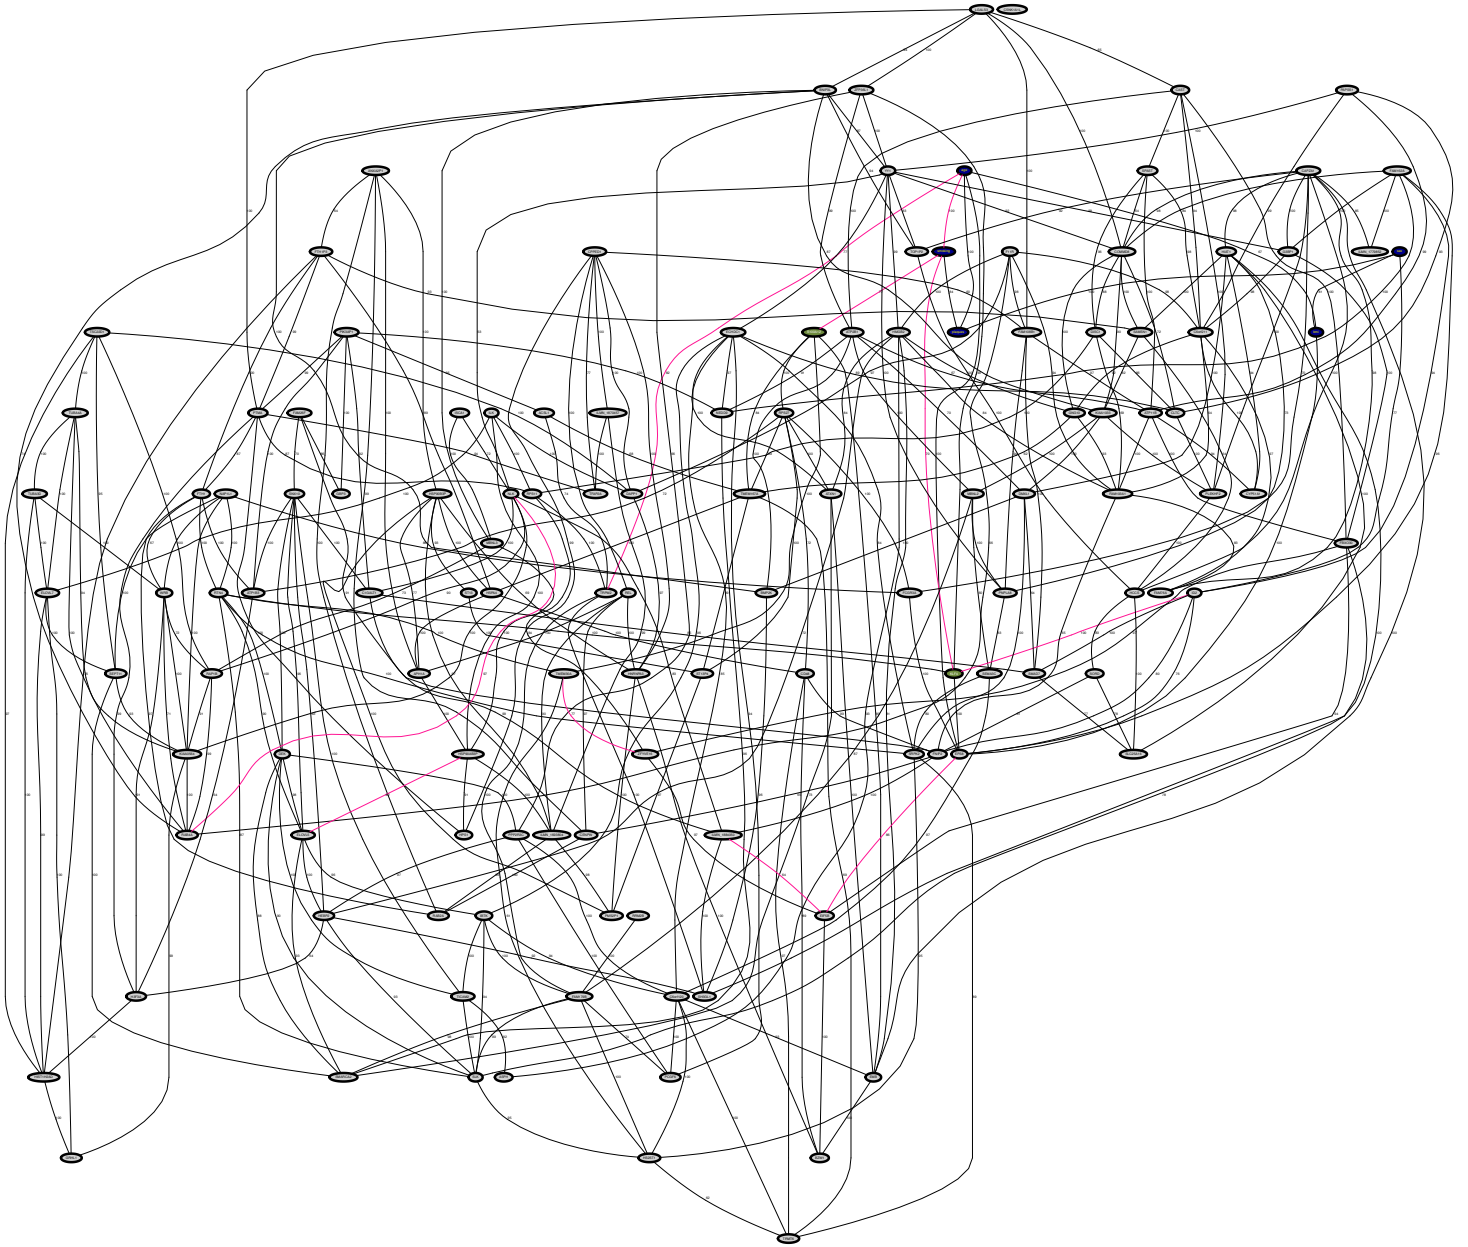

# Network Skeleton for Pattern 11

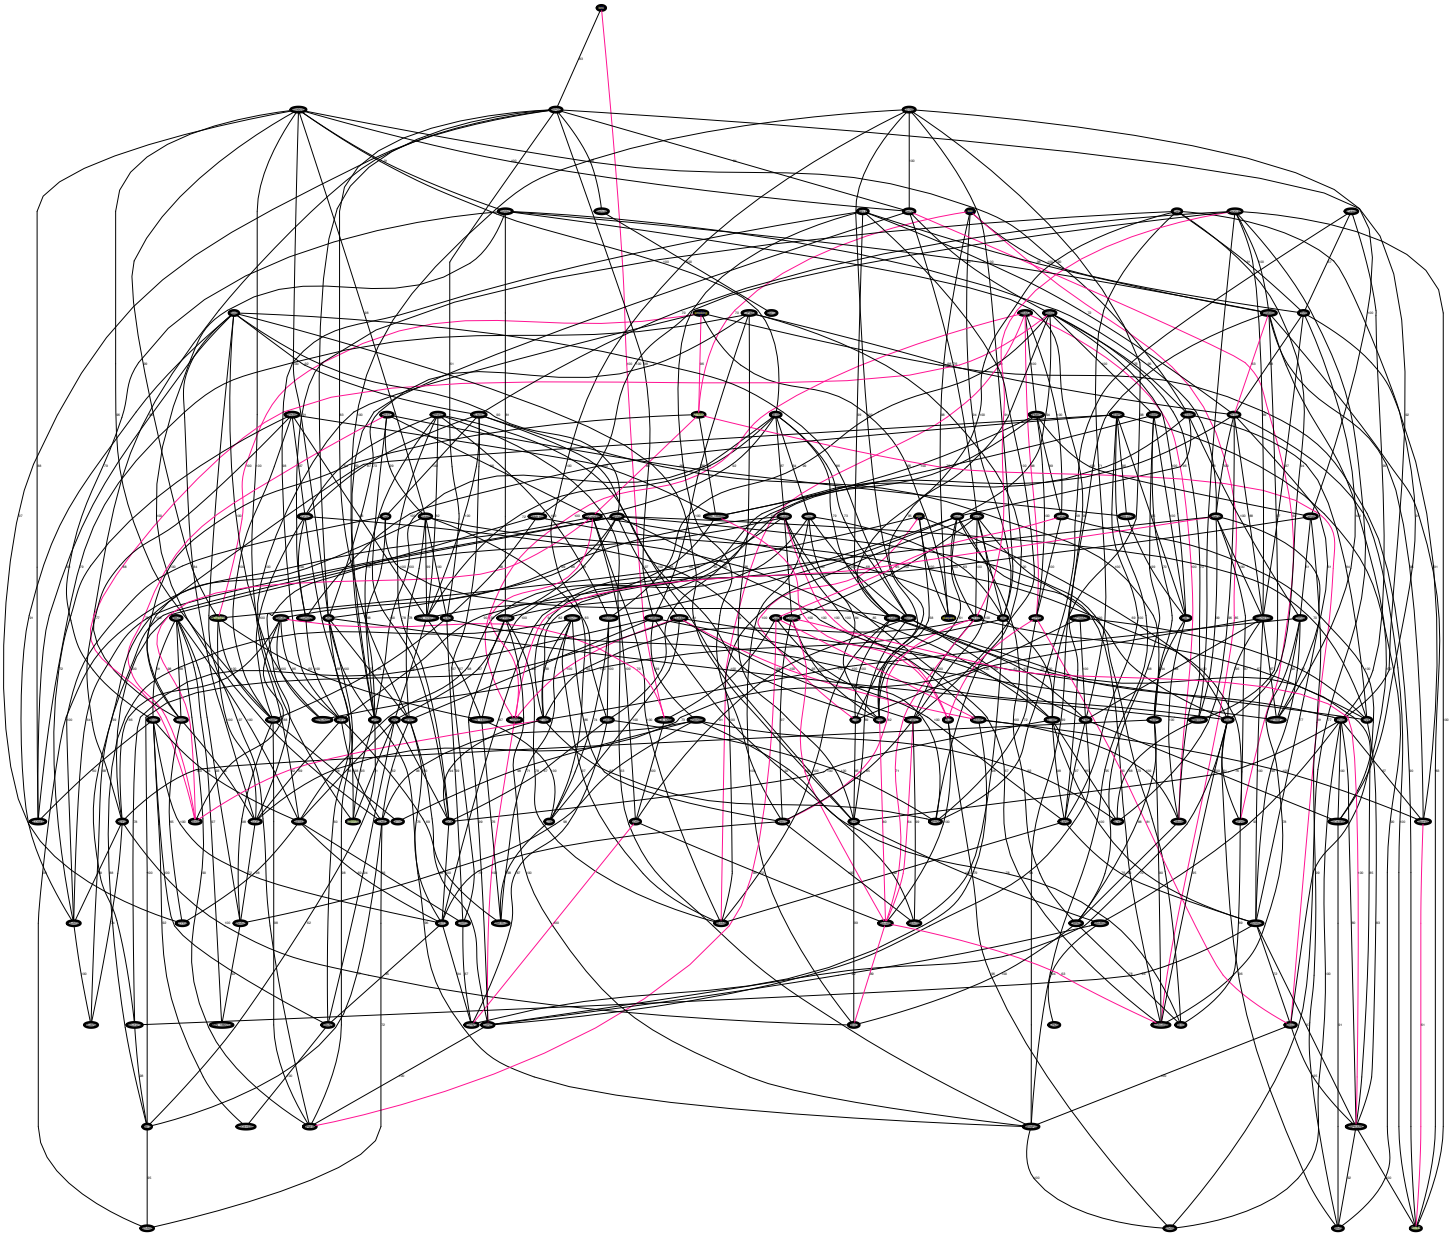

# Network Skeleton for Pattern 12

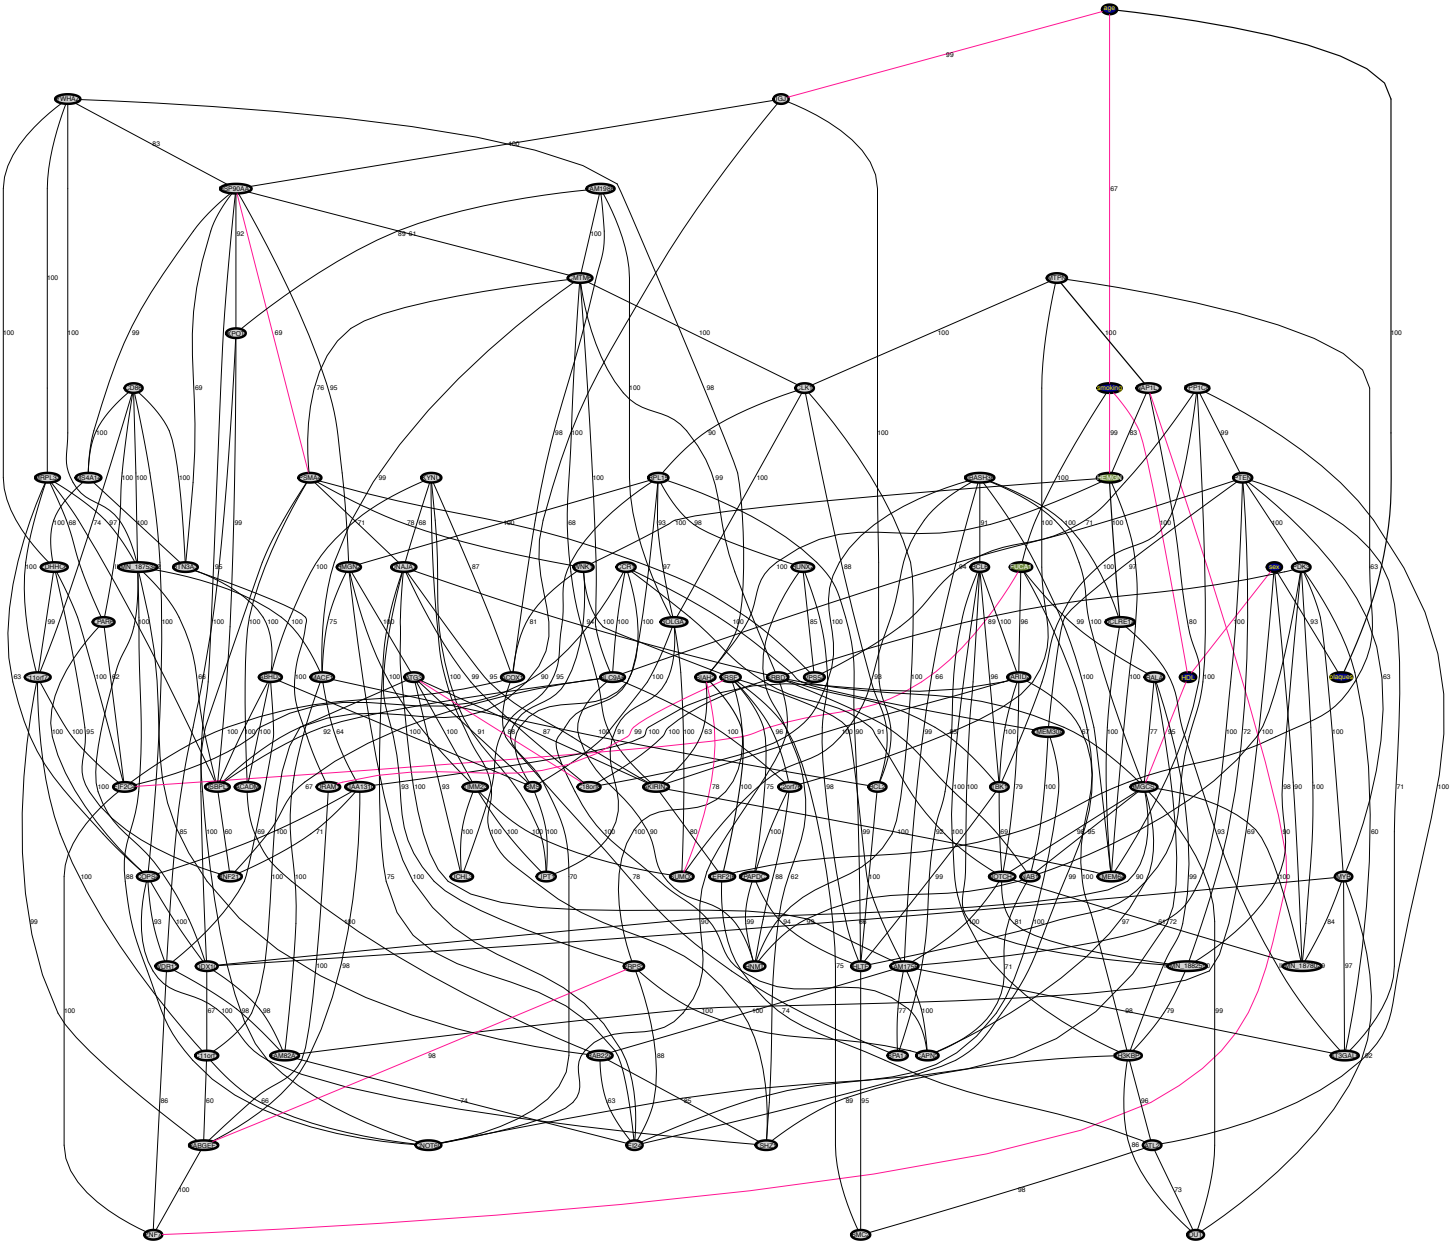

# Network Skeleton for Pattern 14

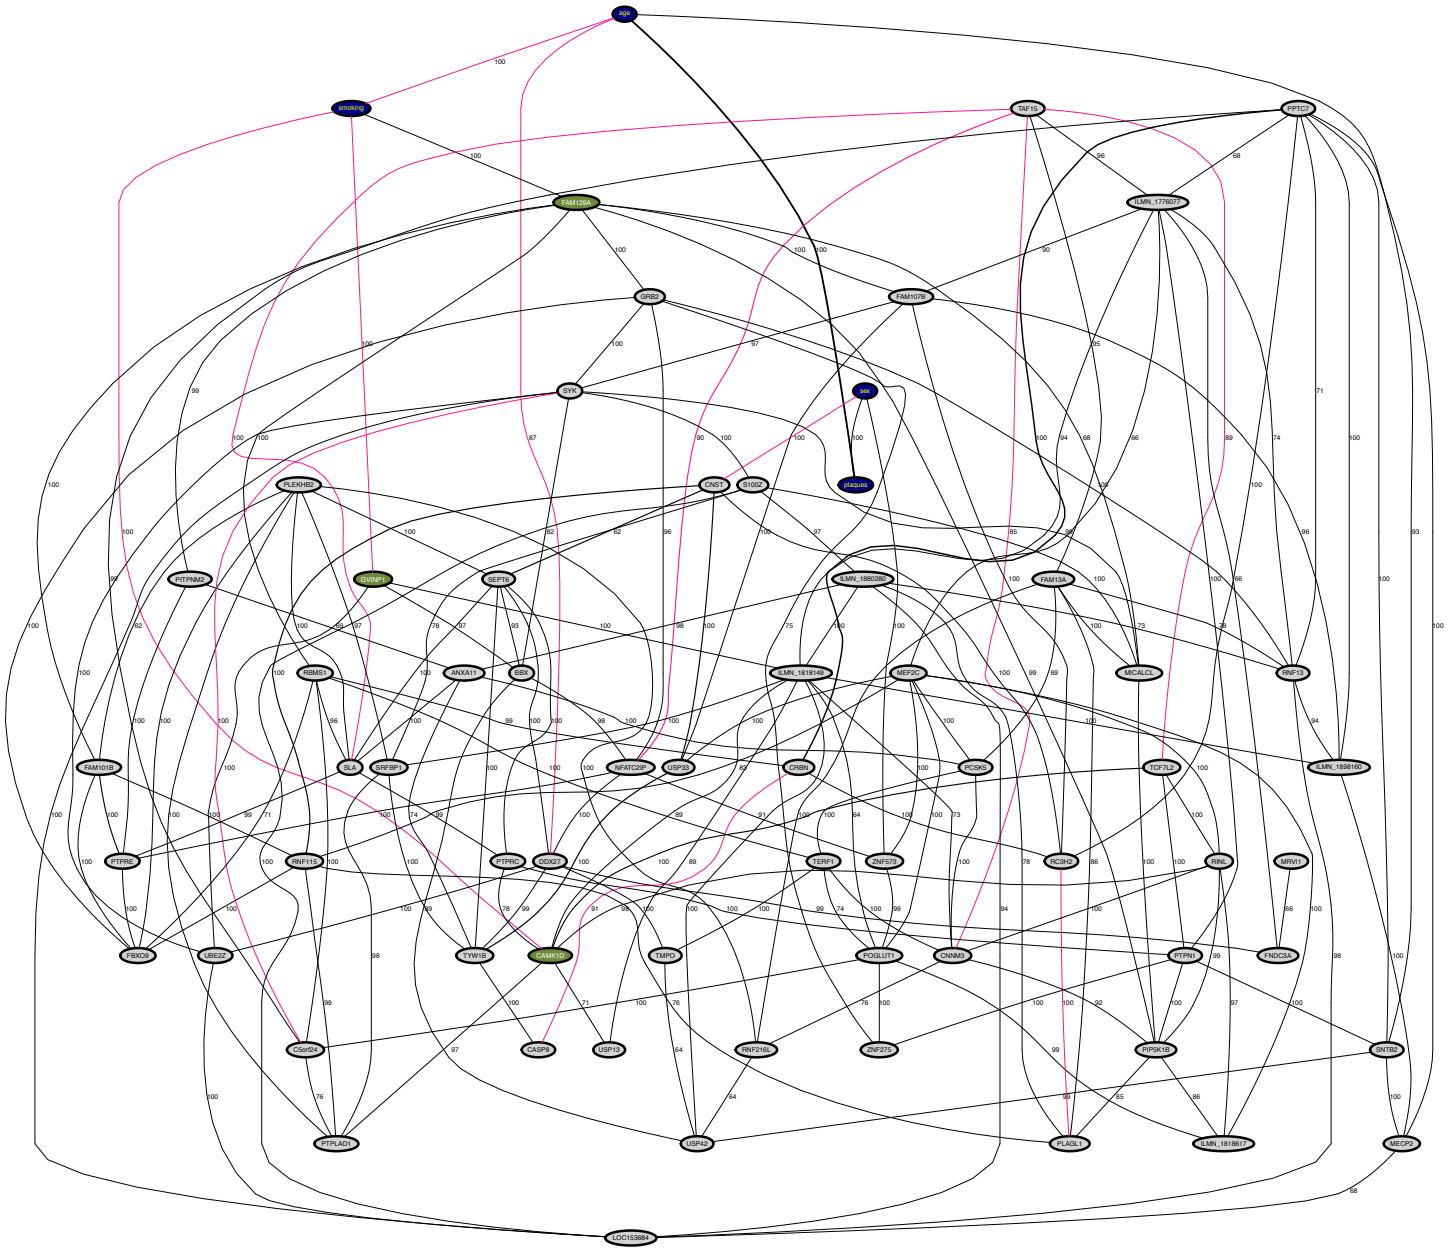

## Network Skeleton for Pattern 15

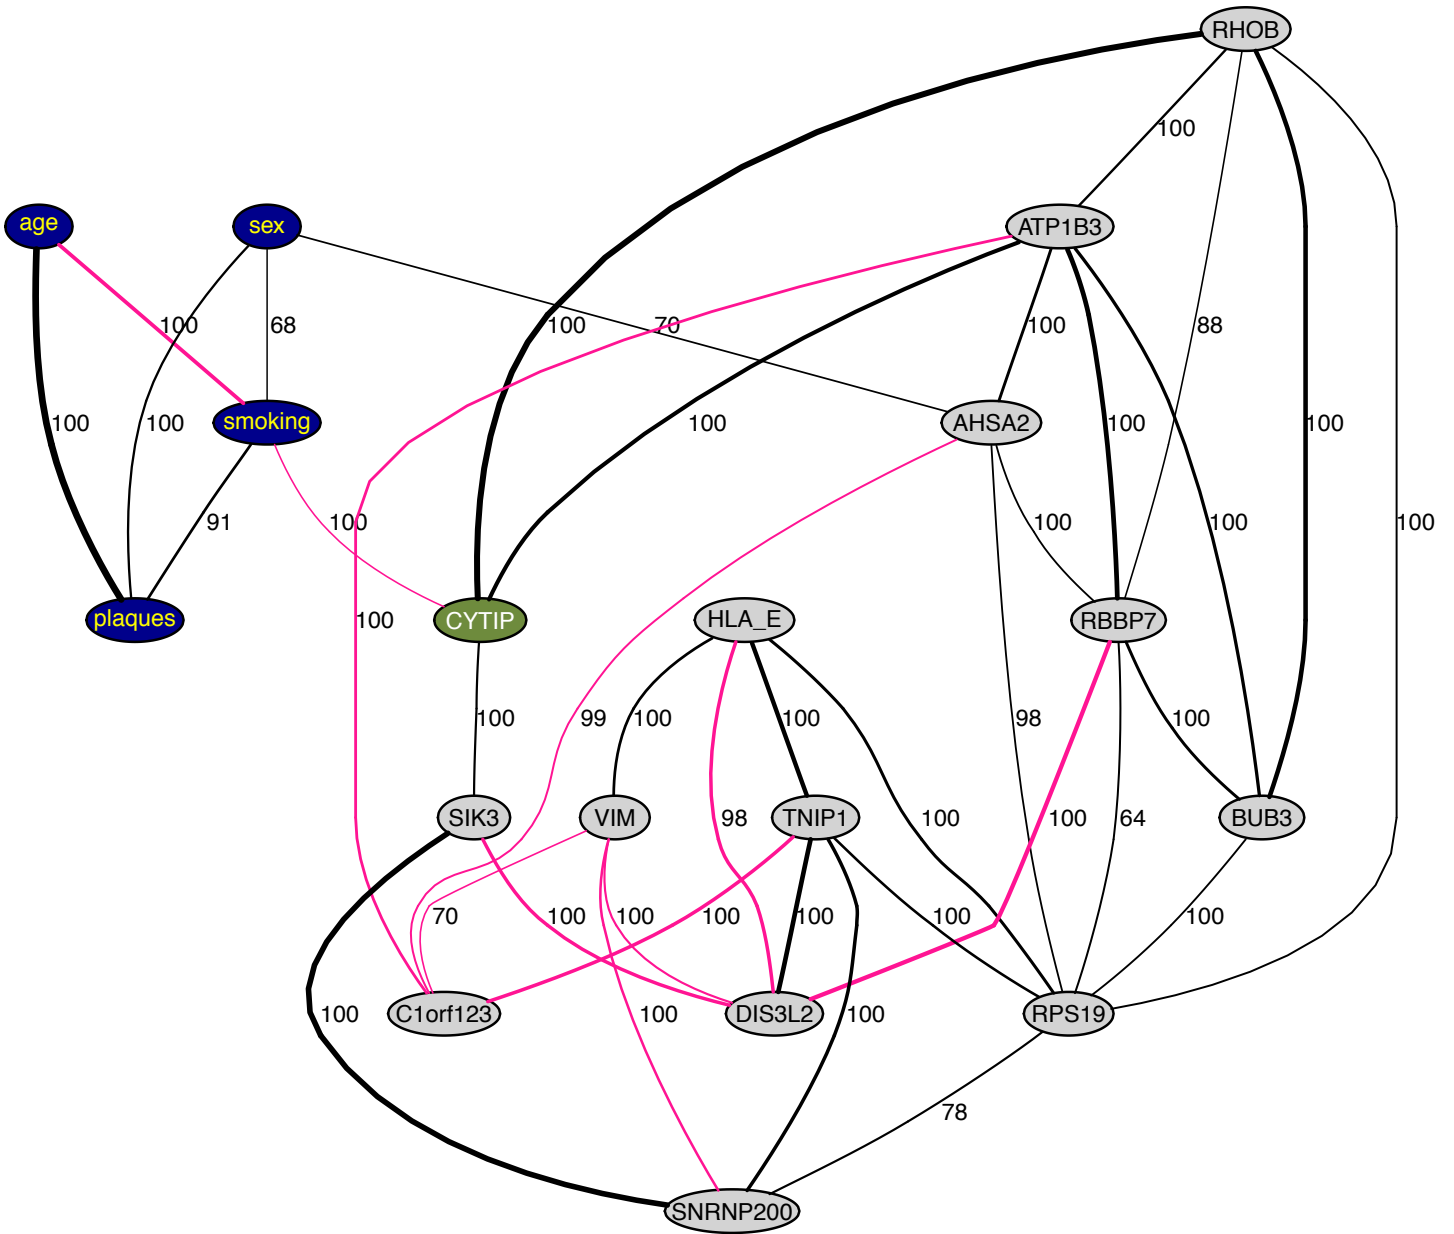





# Network Skeleton for Pattern 18

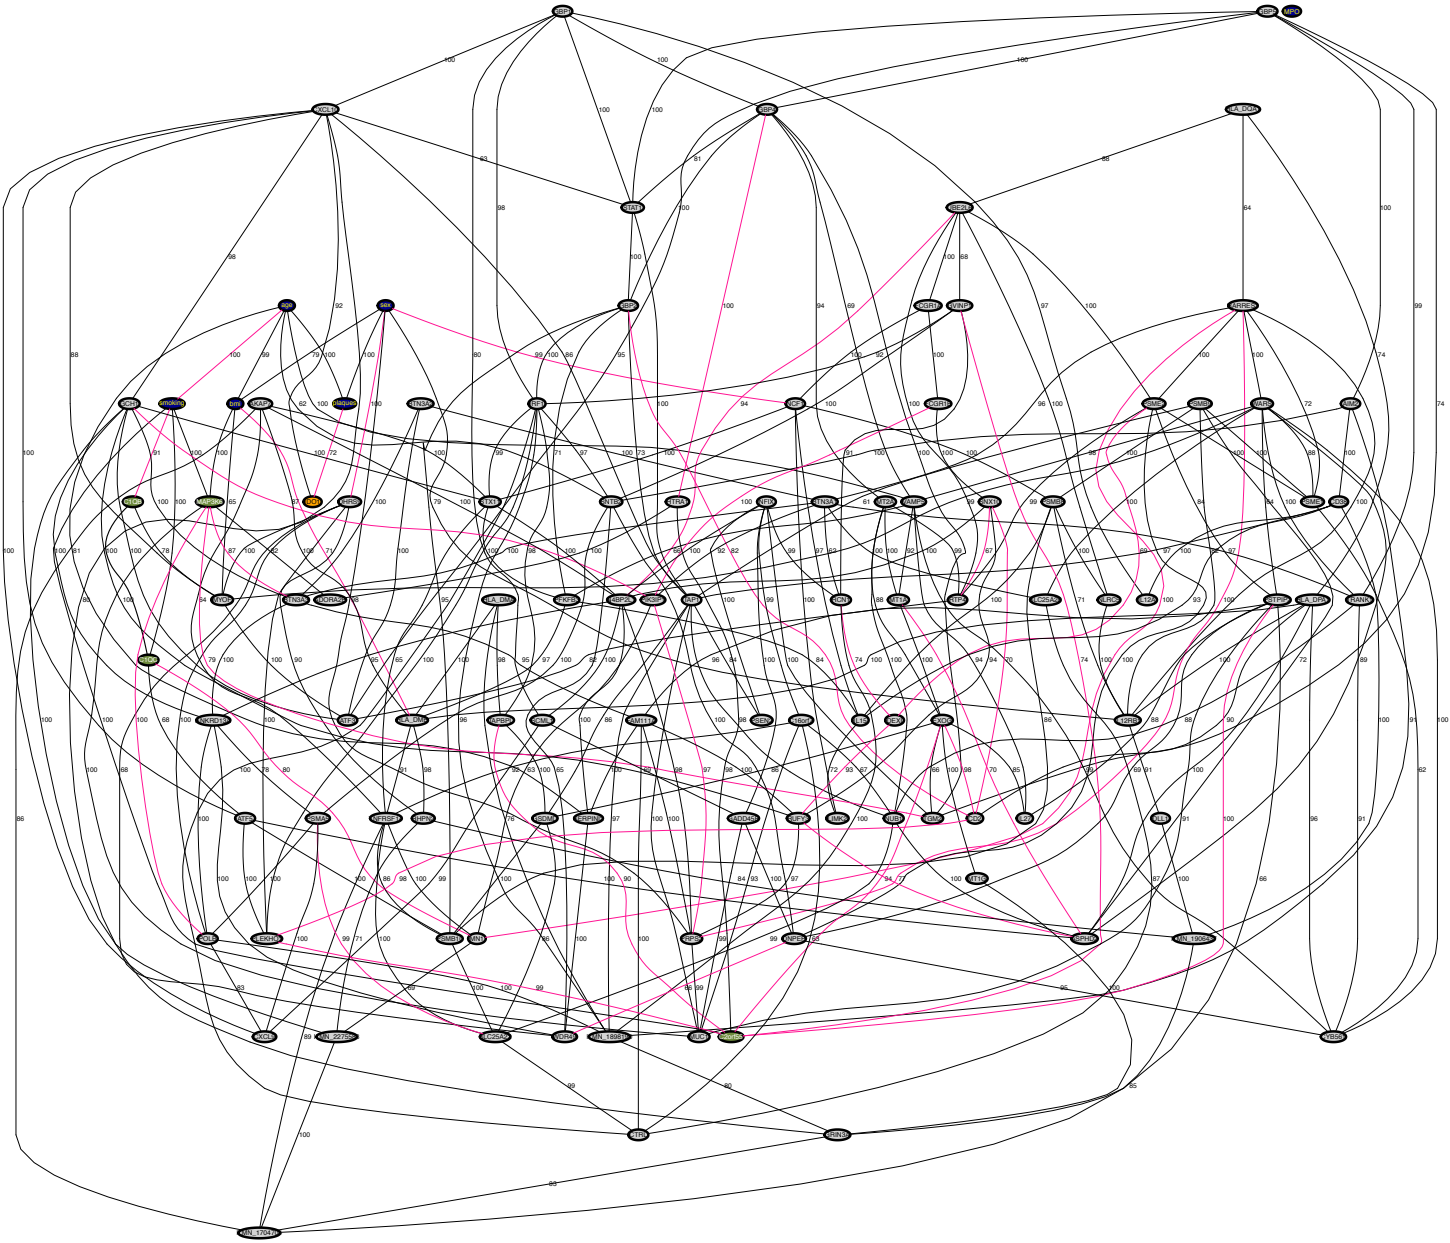



# Network Skeleton for Pattern 19

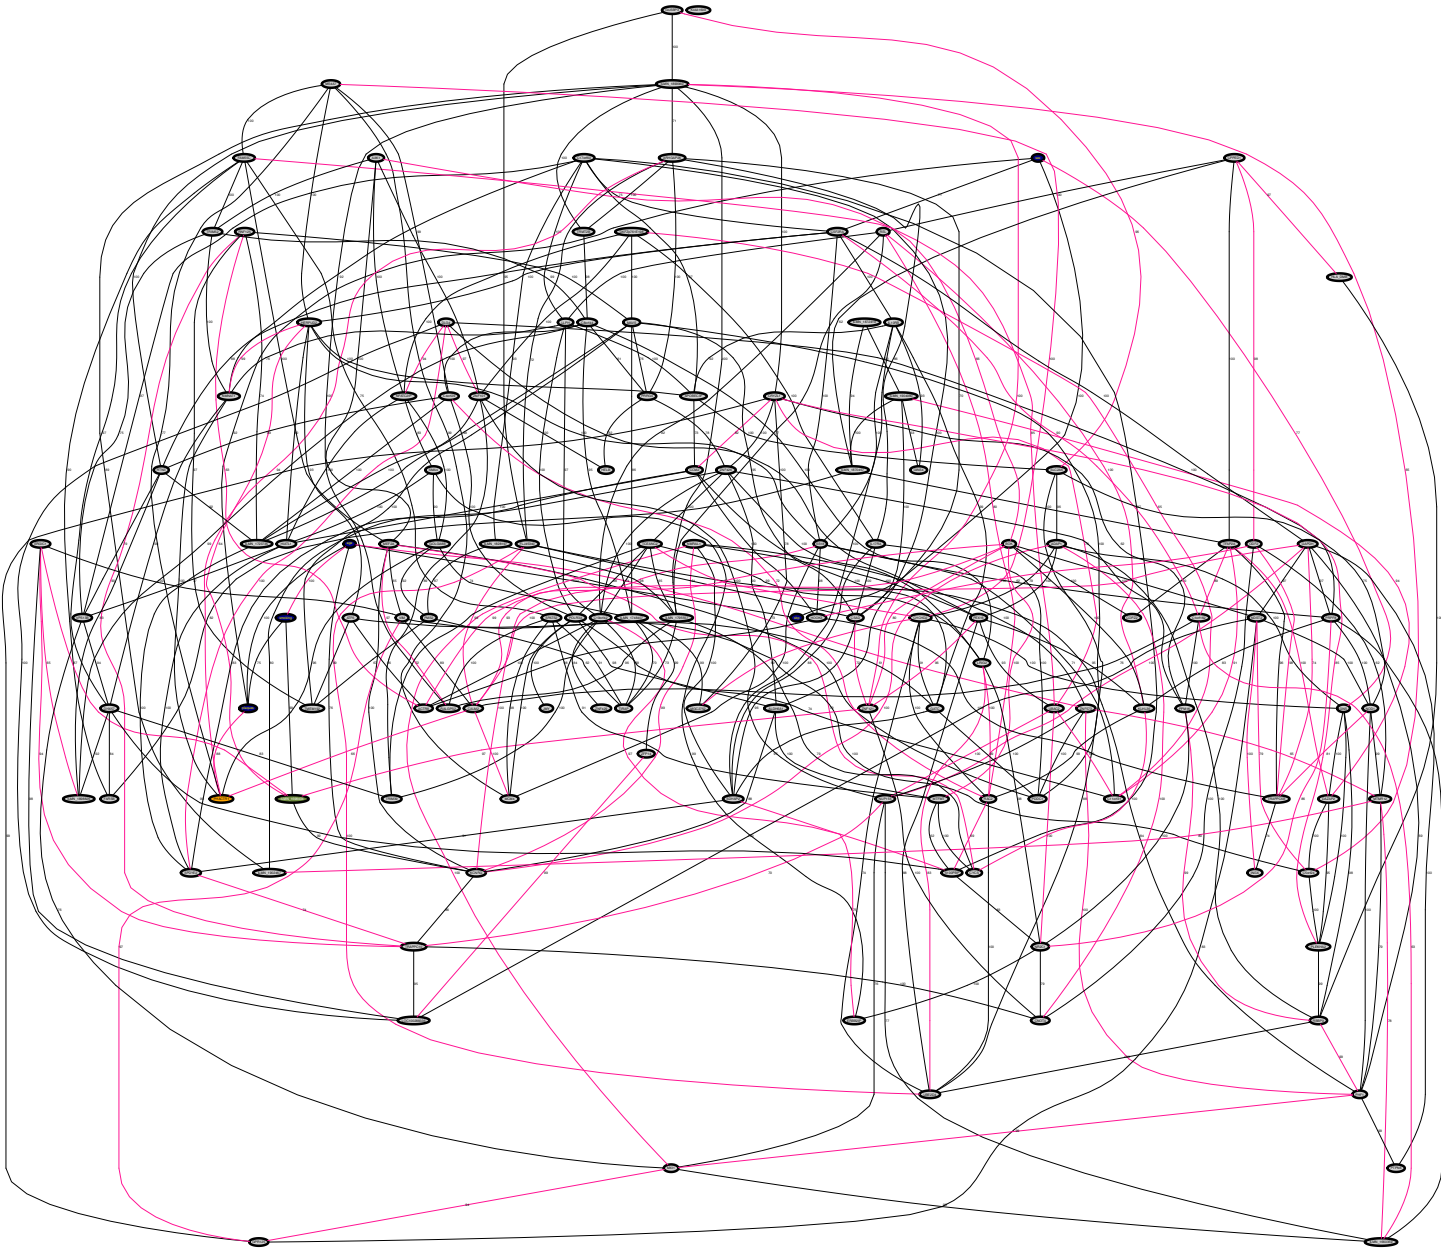

# Network Skeleton for Pattern 21

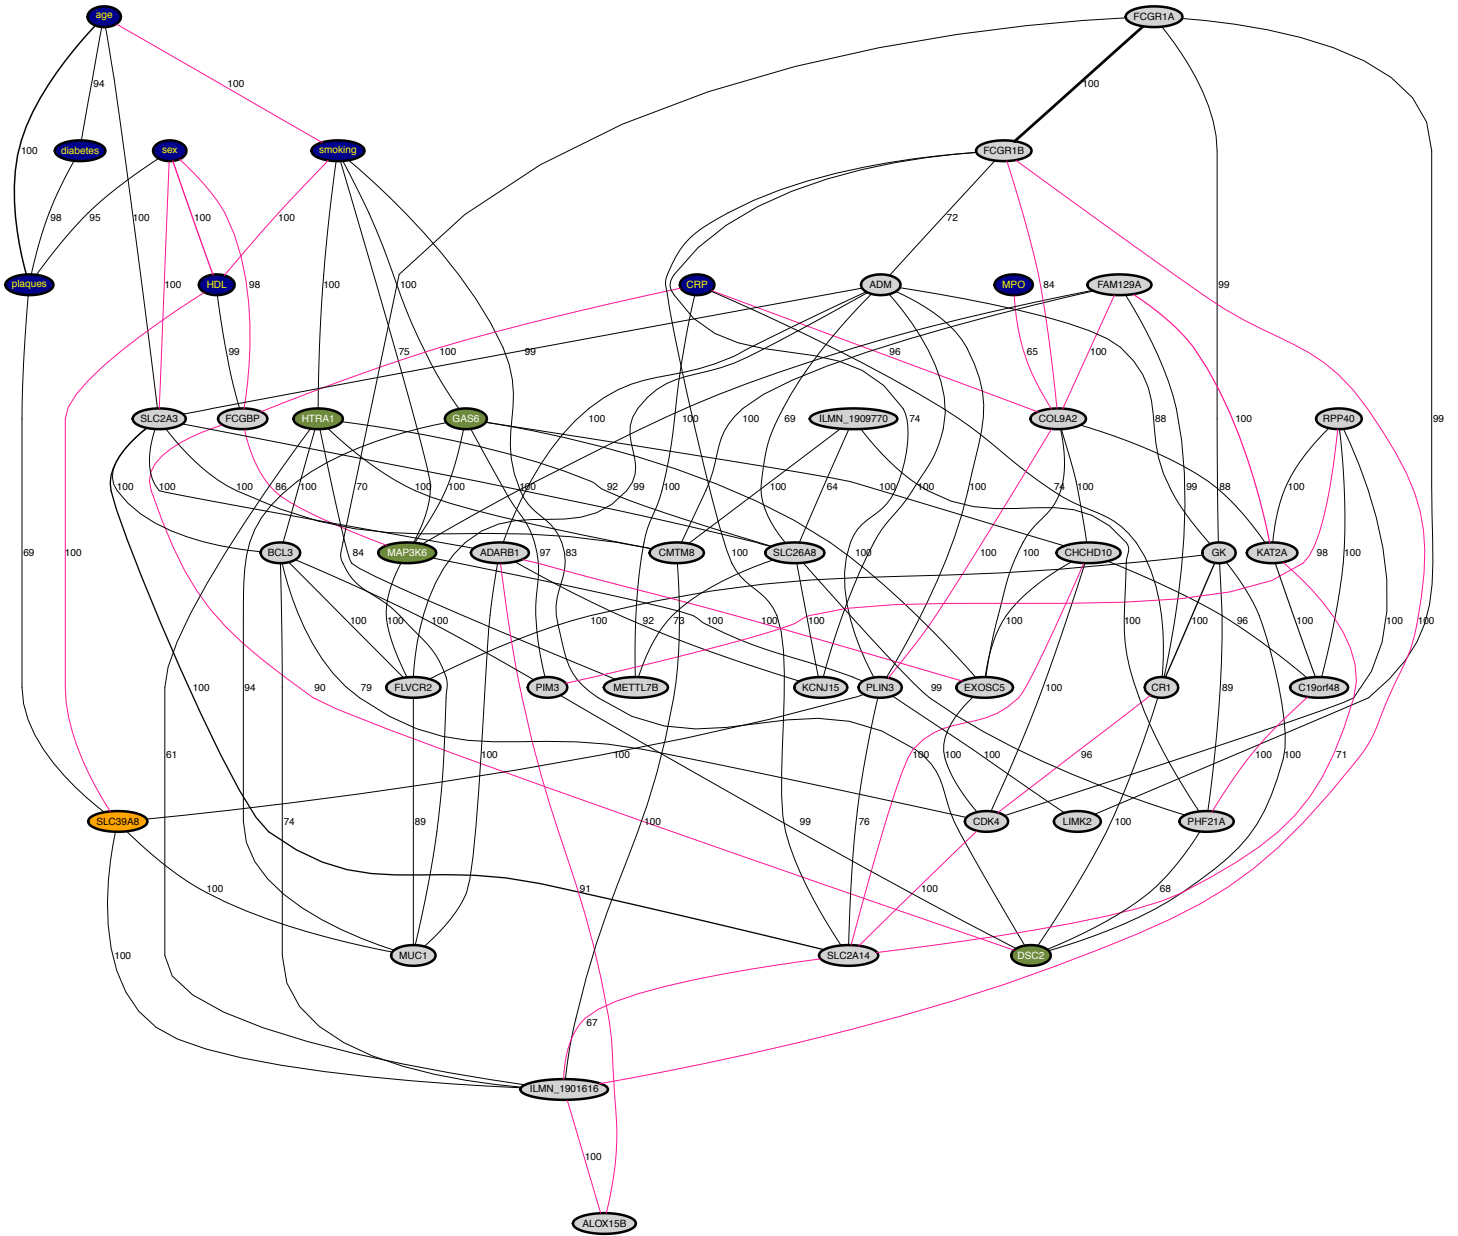

# Network Skeleton for Pattern 23

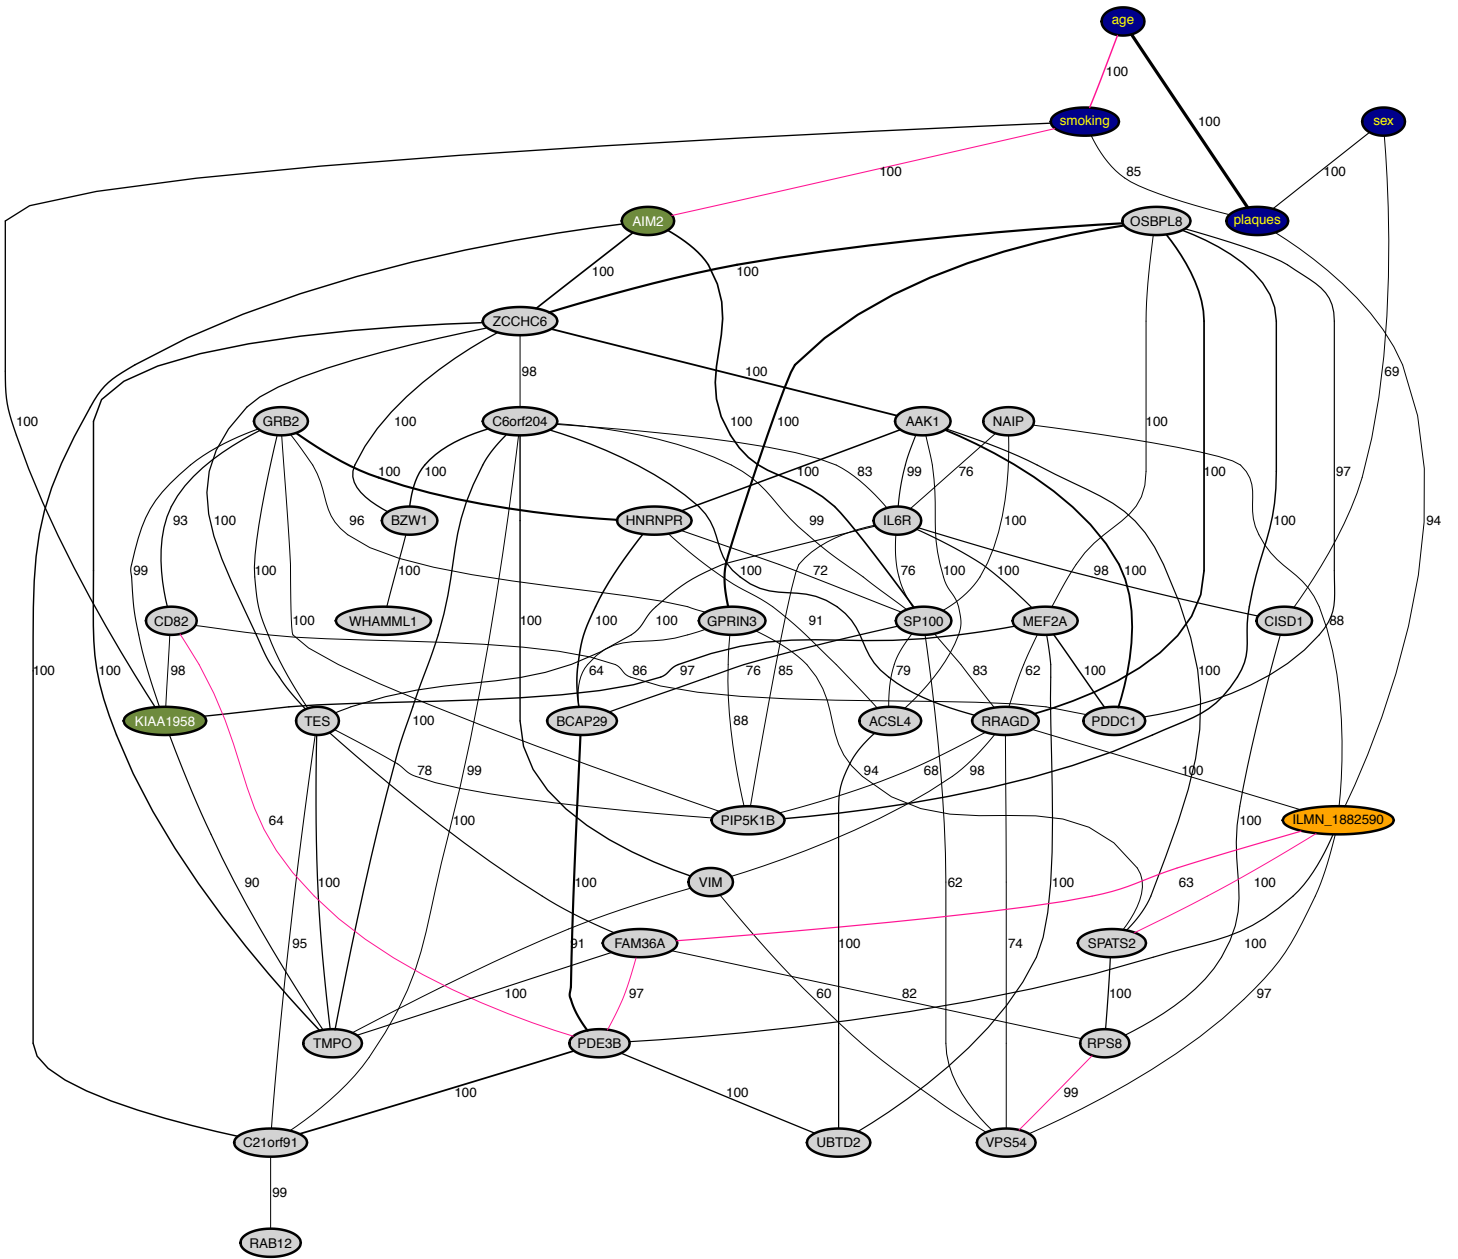





# Network Skeleton for Pattern 29

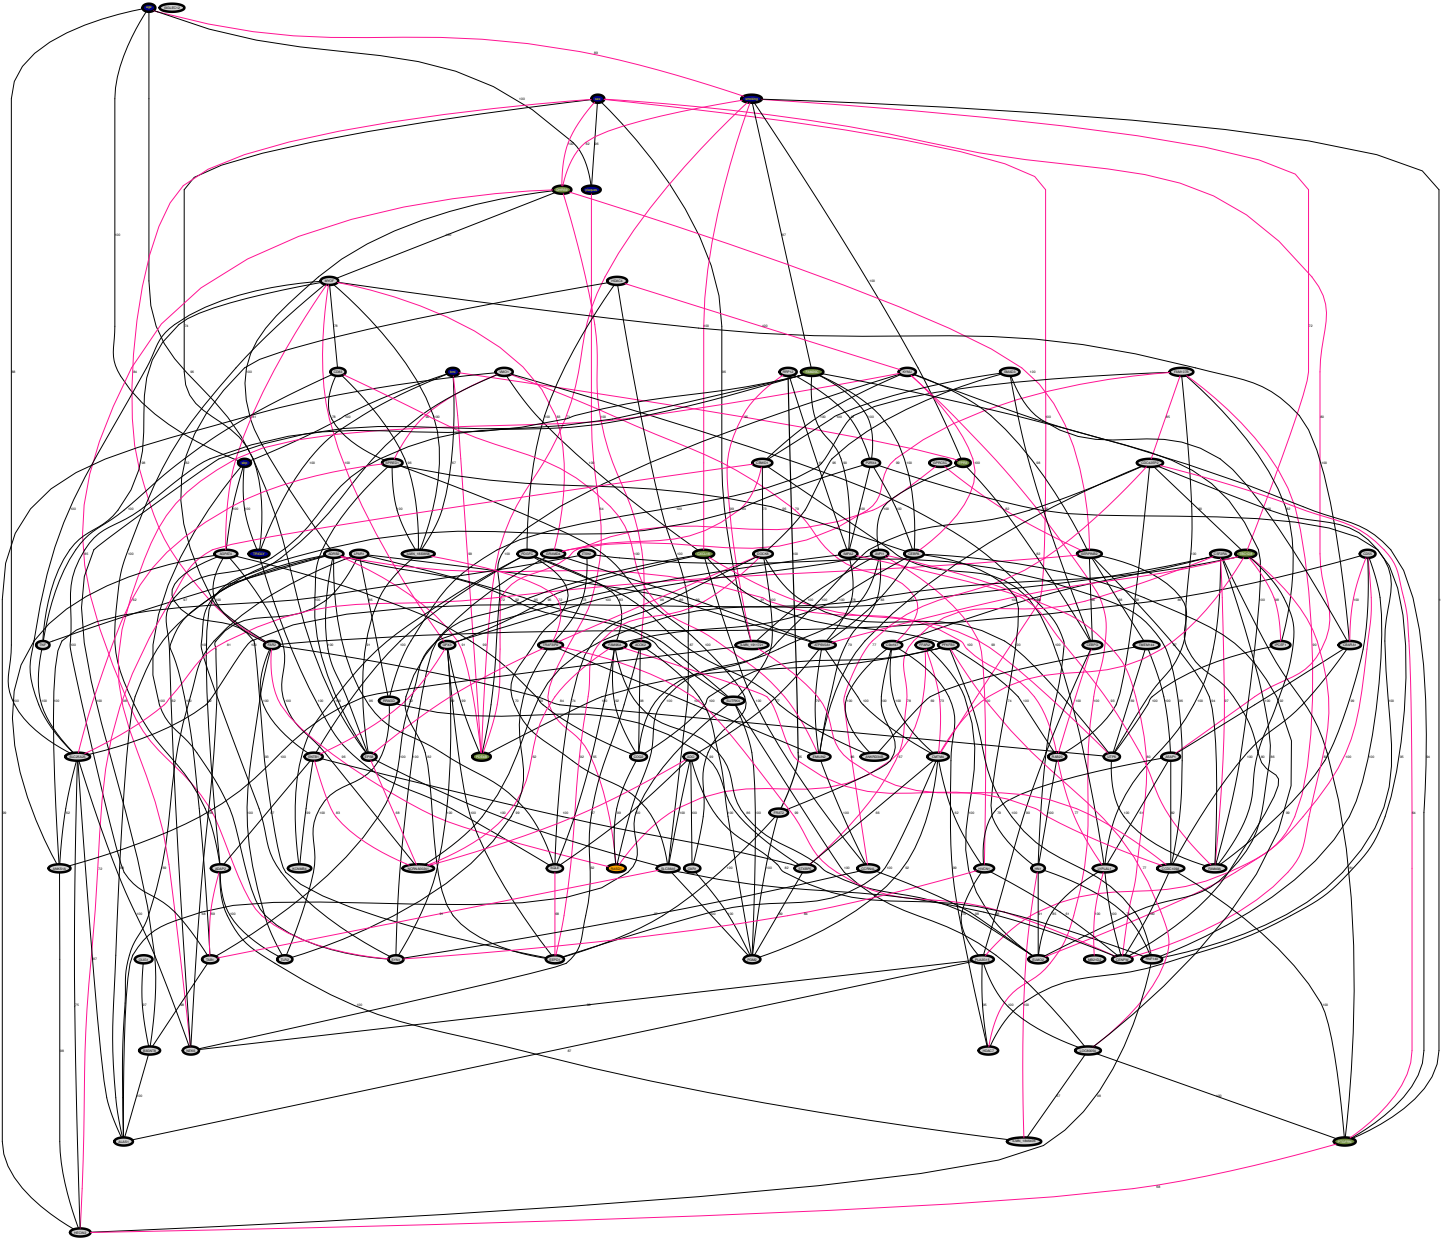



# Network Skeleton for Pattern 30

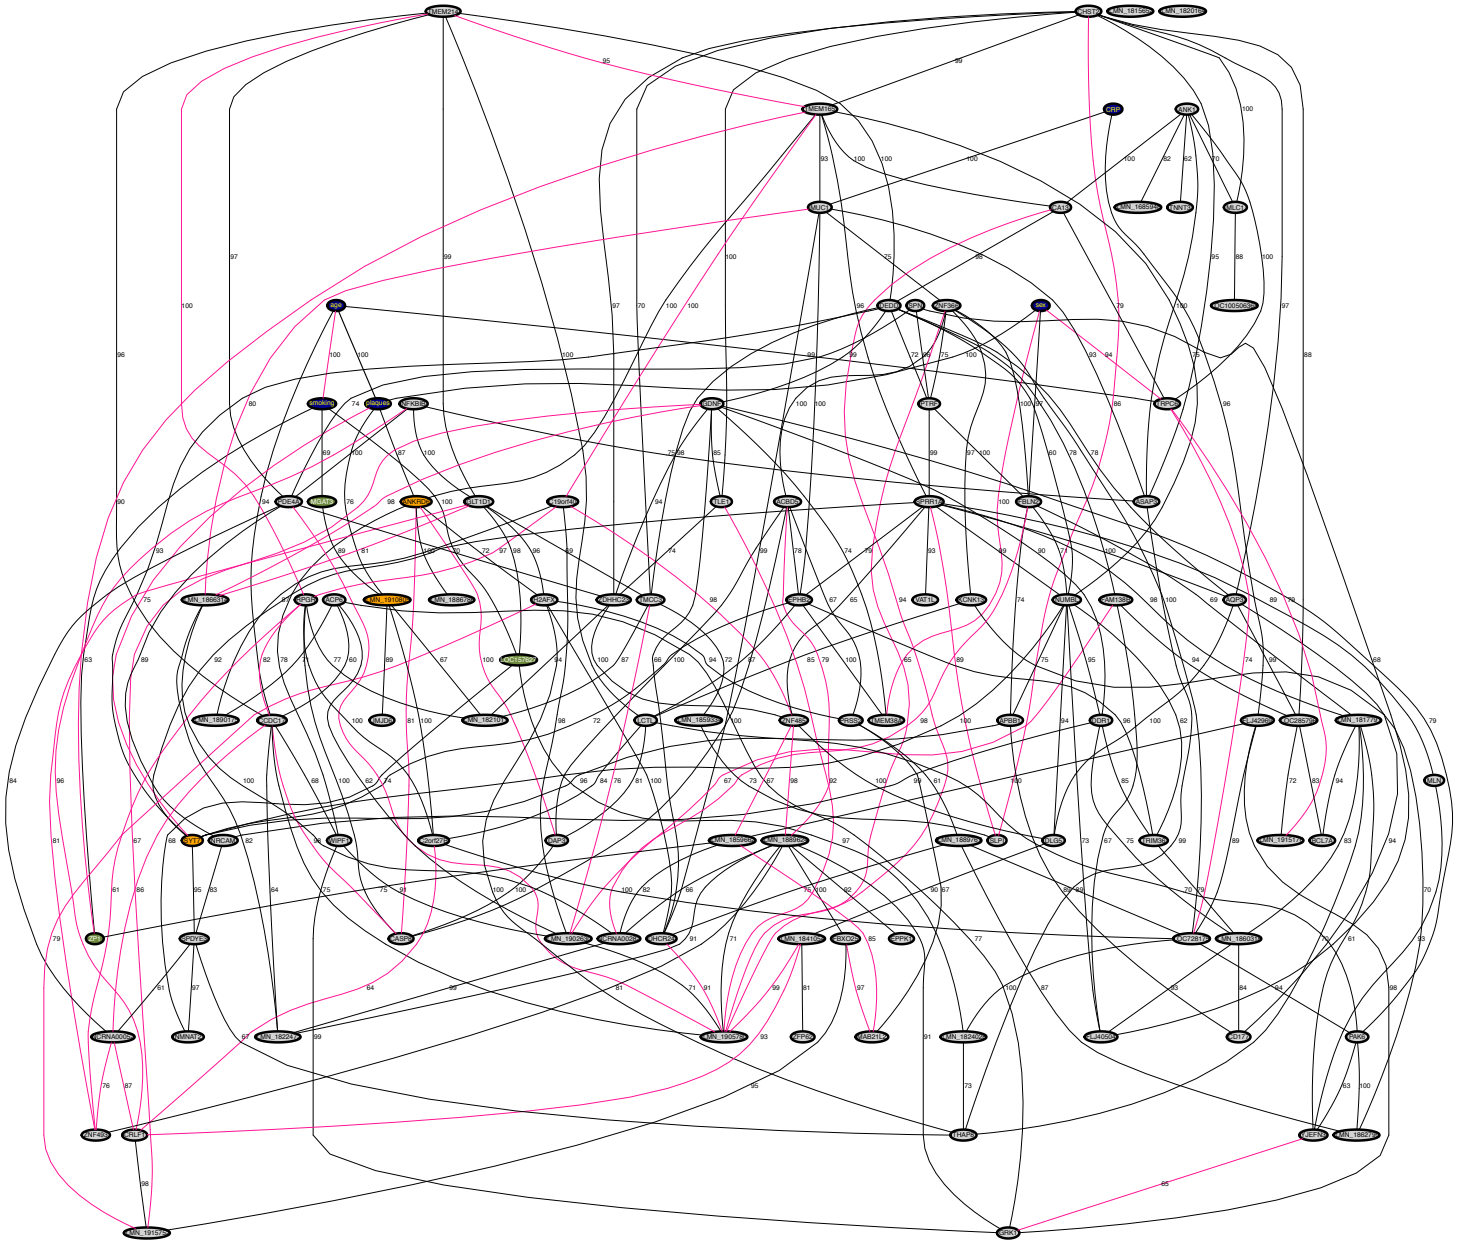

# Network Skeleton for Pattern 31

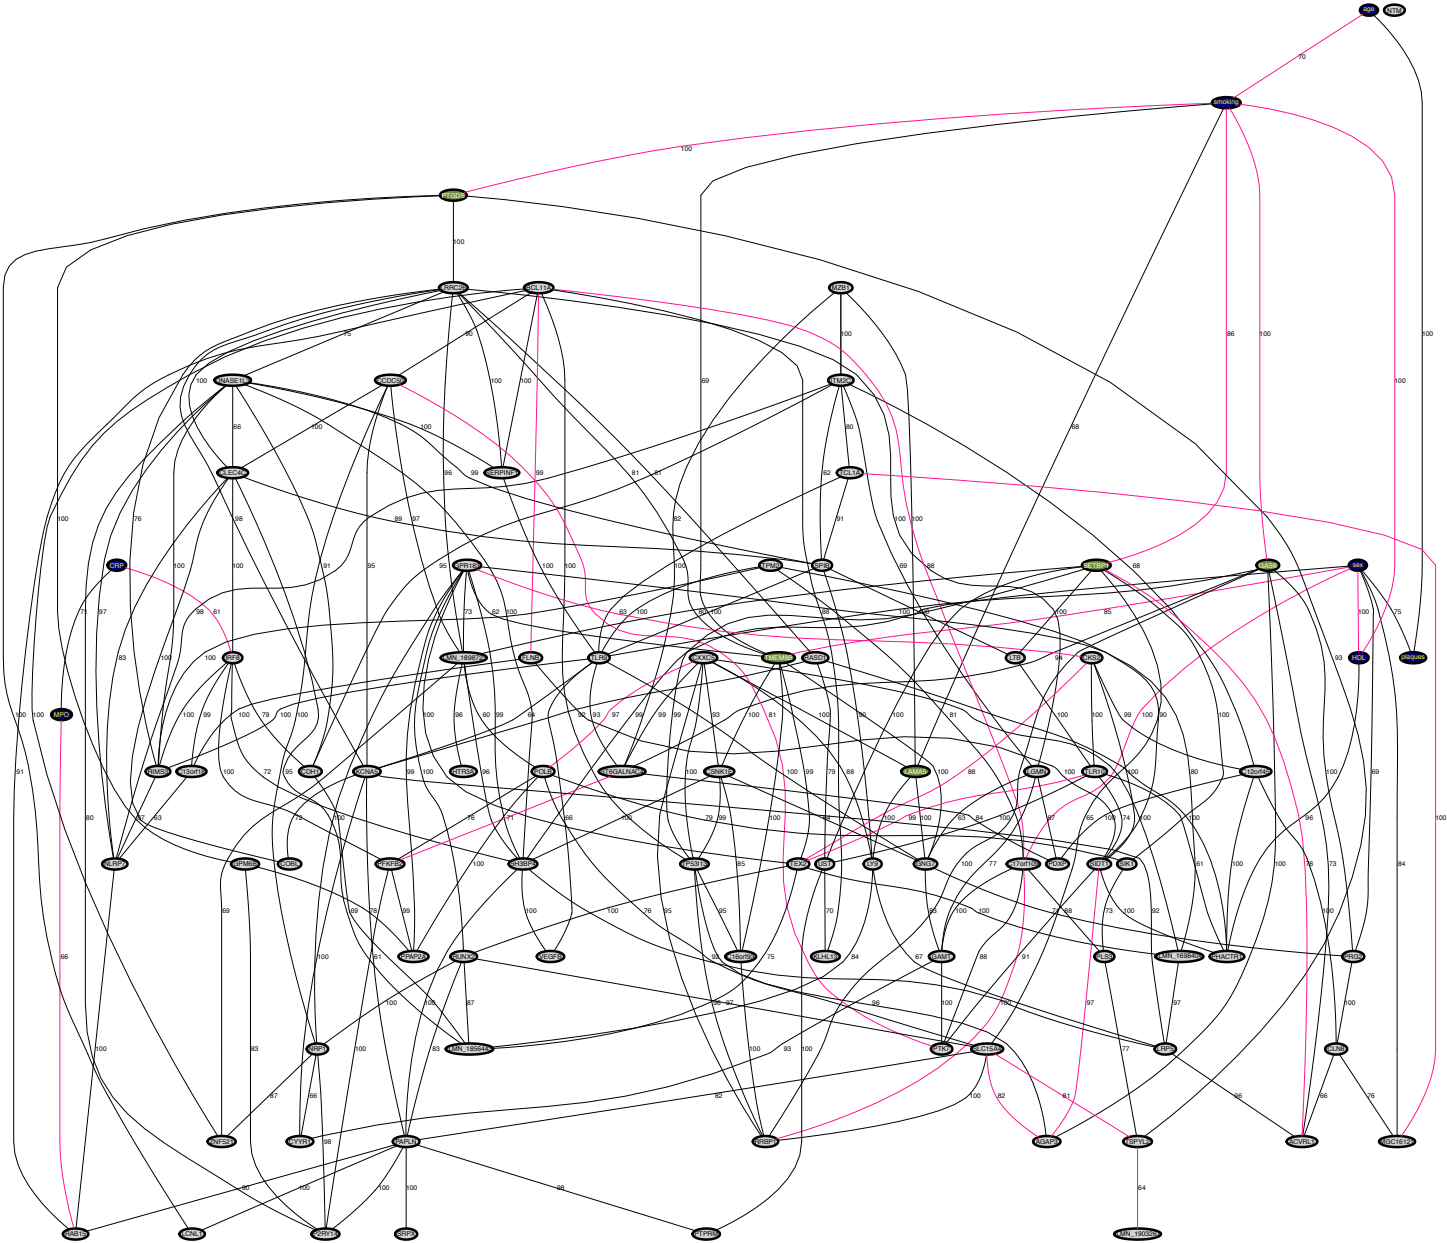

# Network Skeleton for Pattern 33

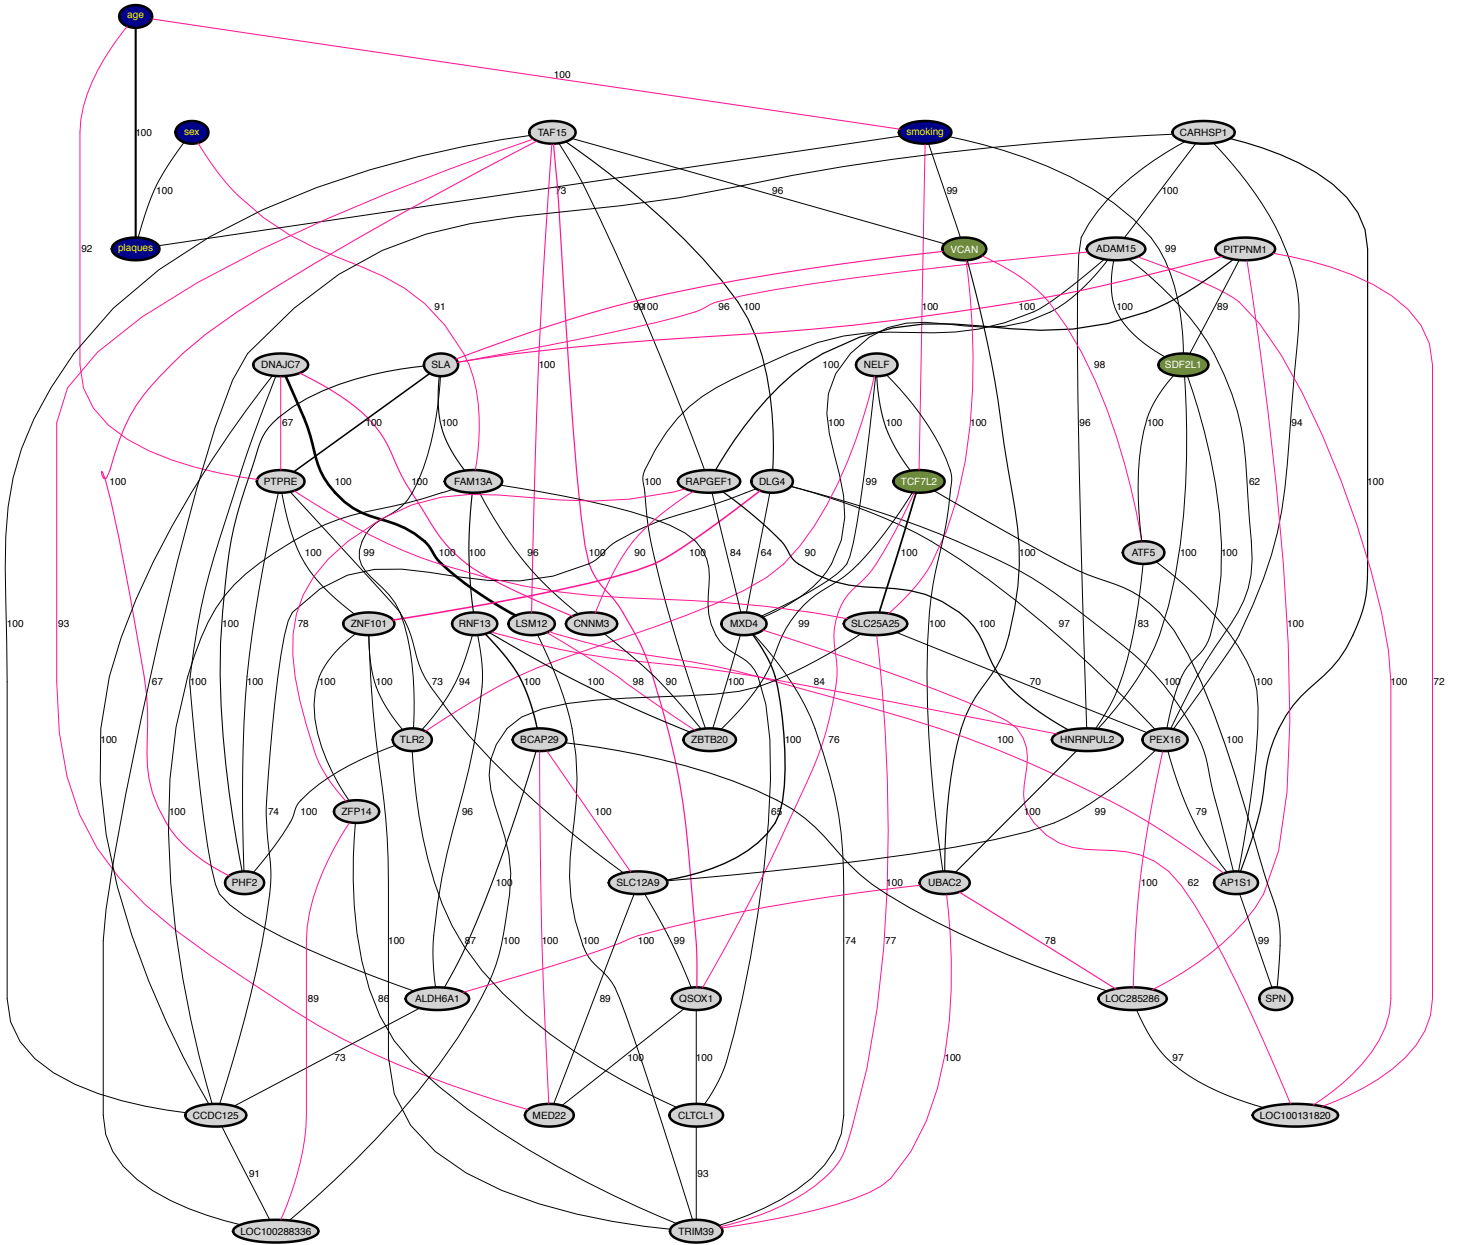









# Network Skeleton for Pattern 41

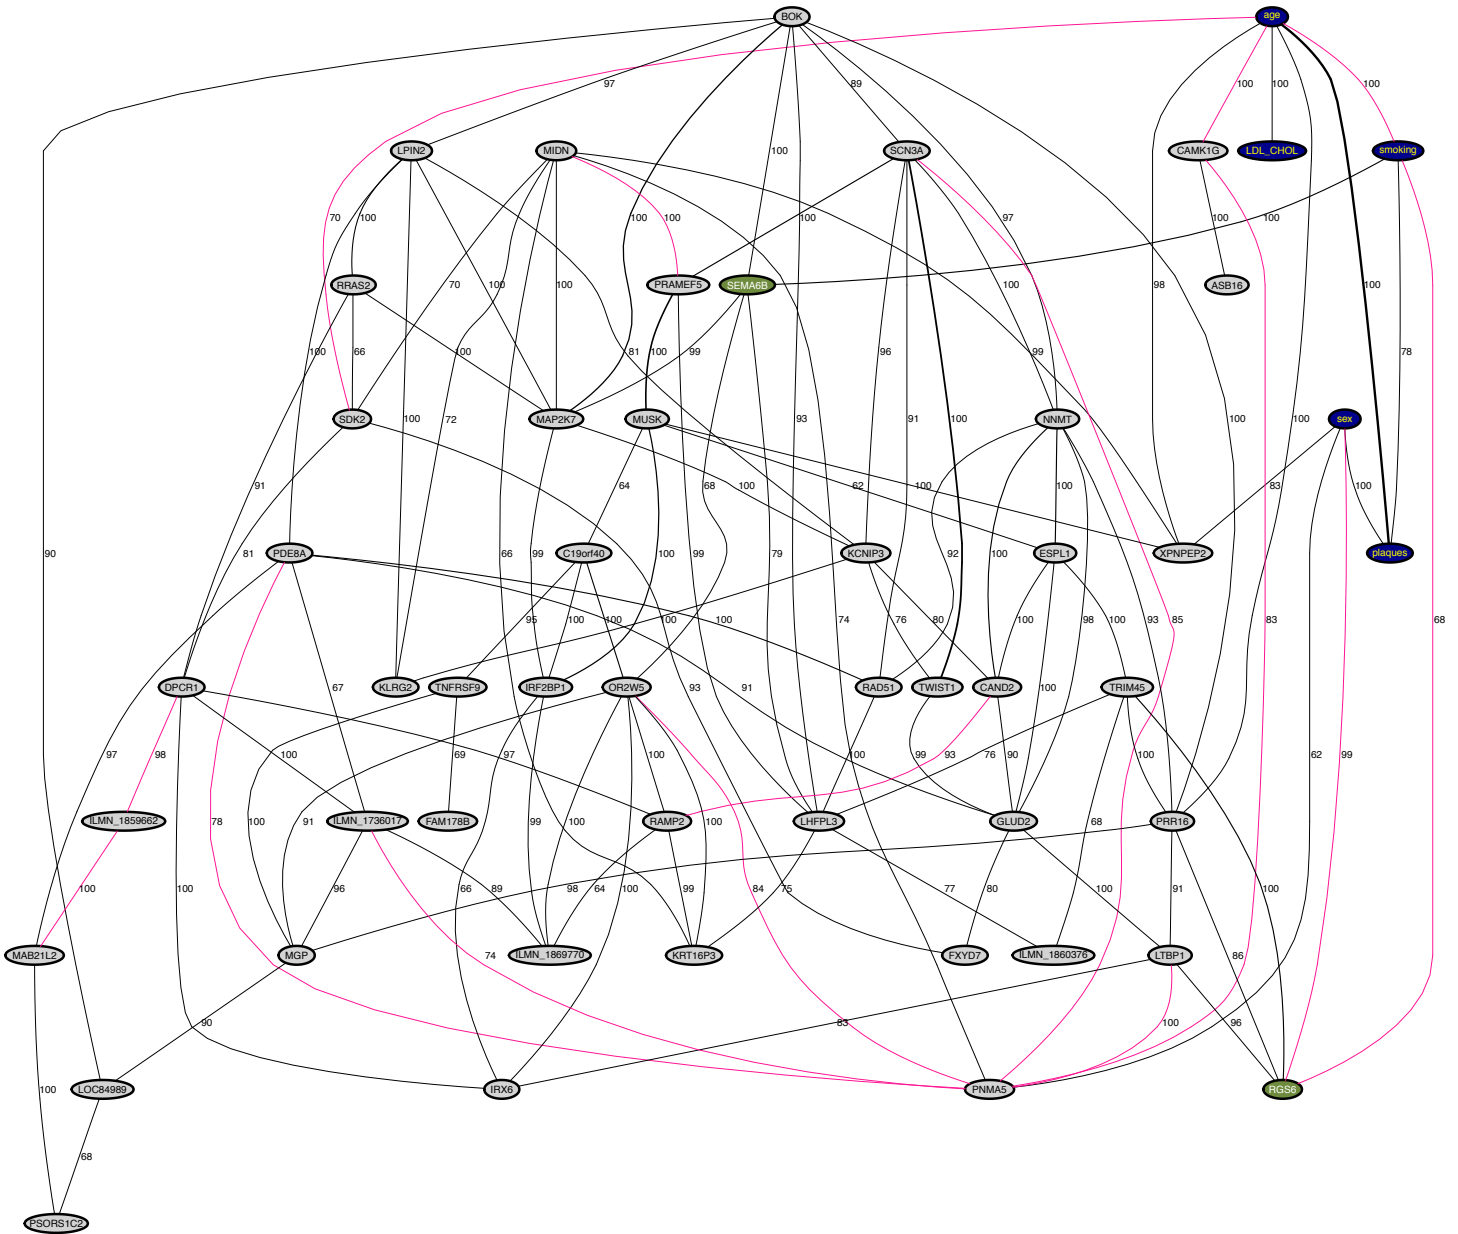





# Network Skeleton for Pattern 45

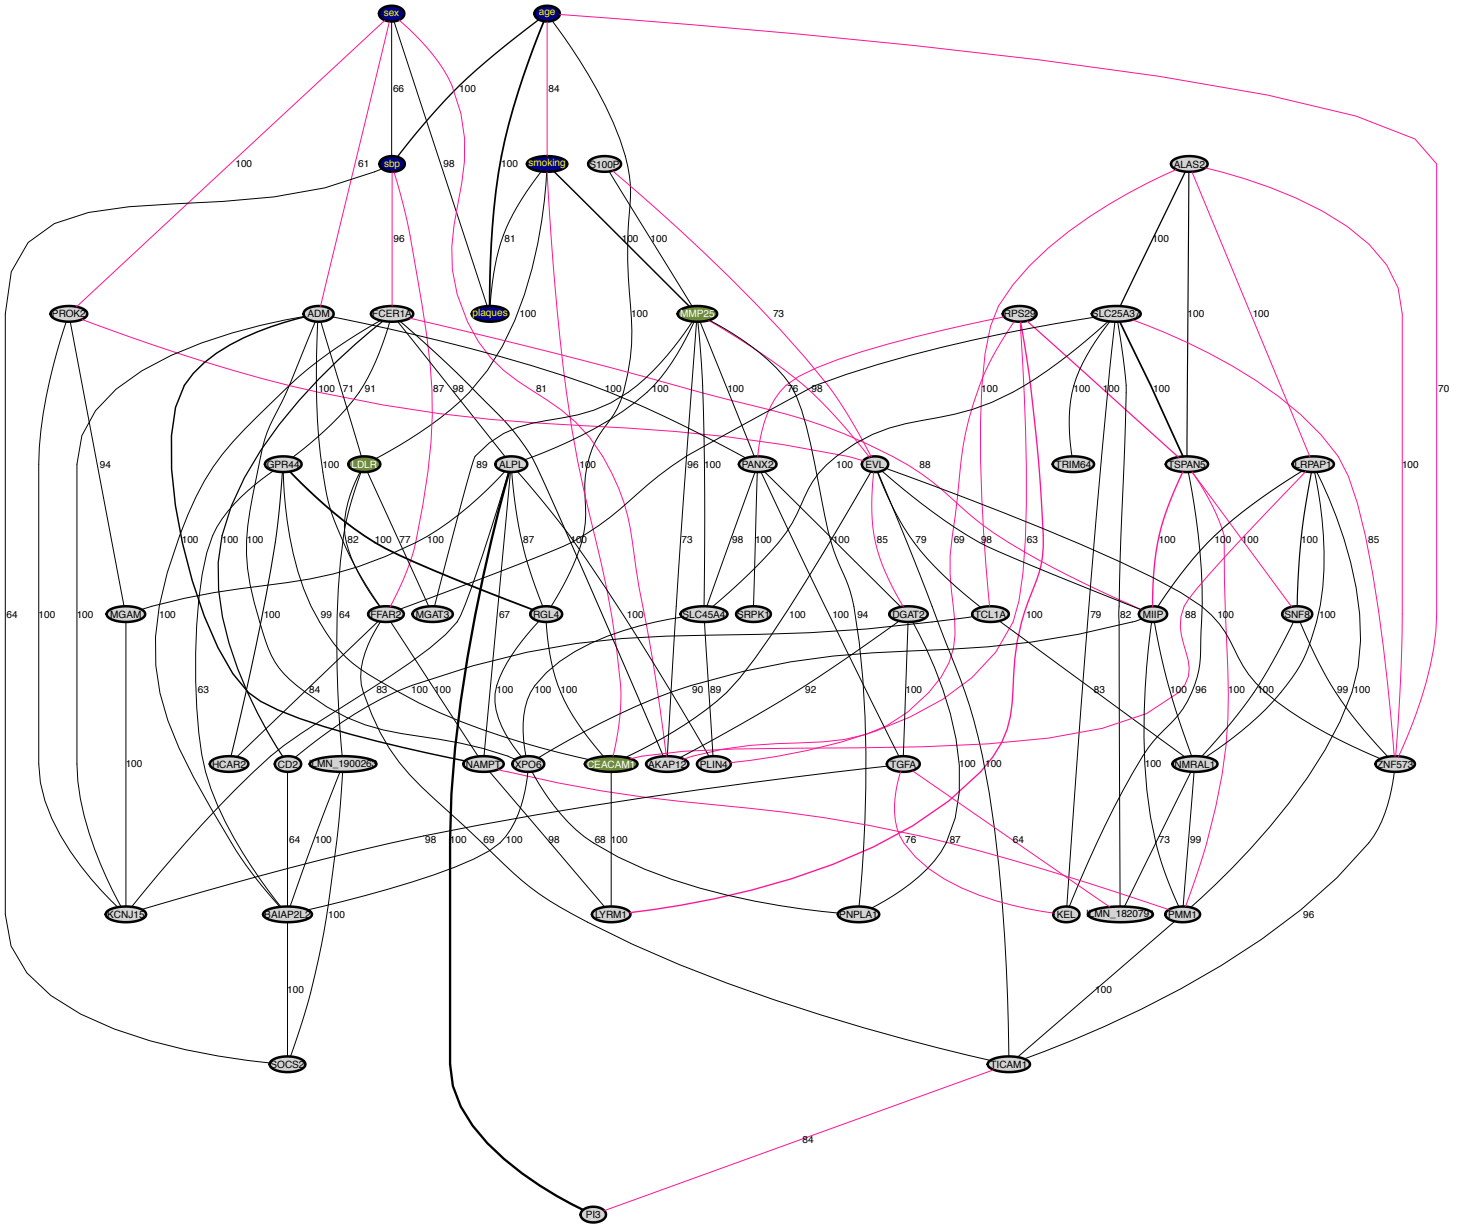

# Network Skeleton for Pattern 48

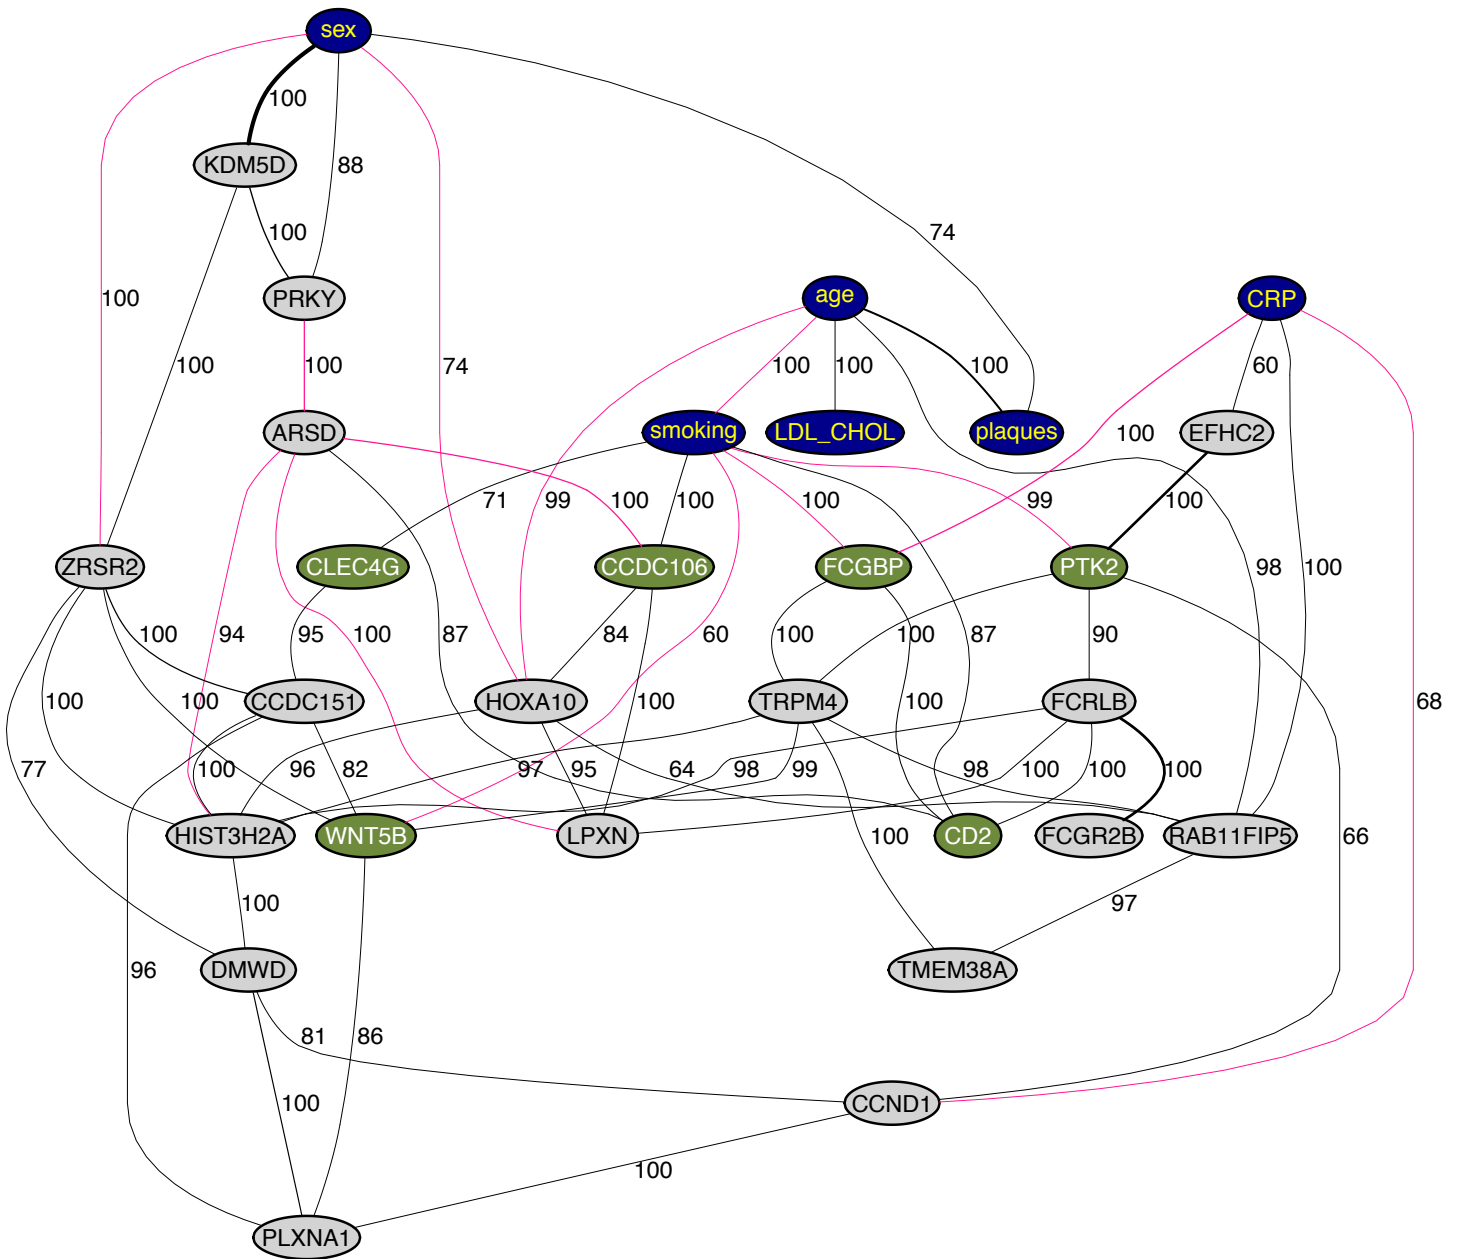

# Network Skeleton for Pattern 49

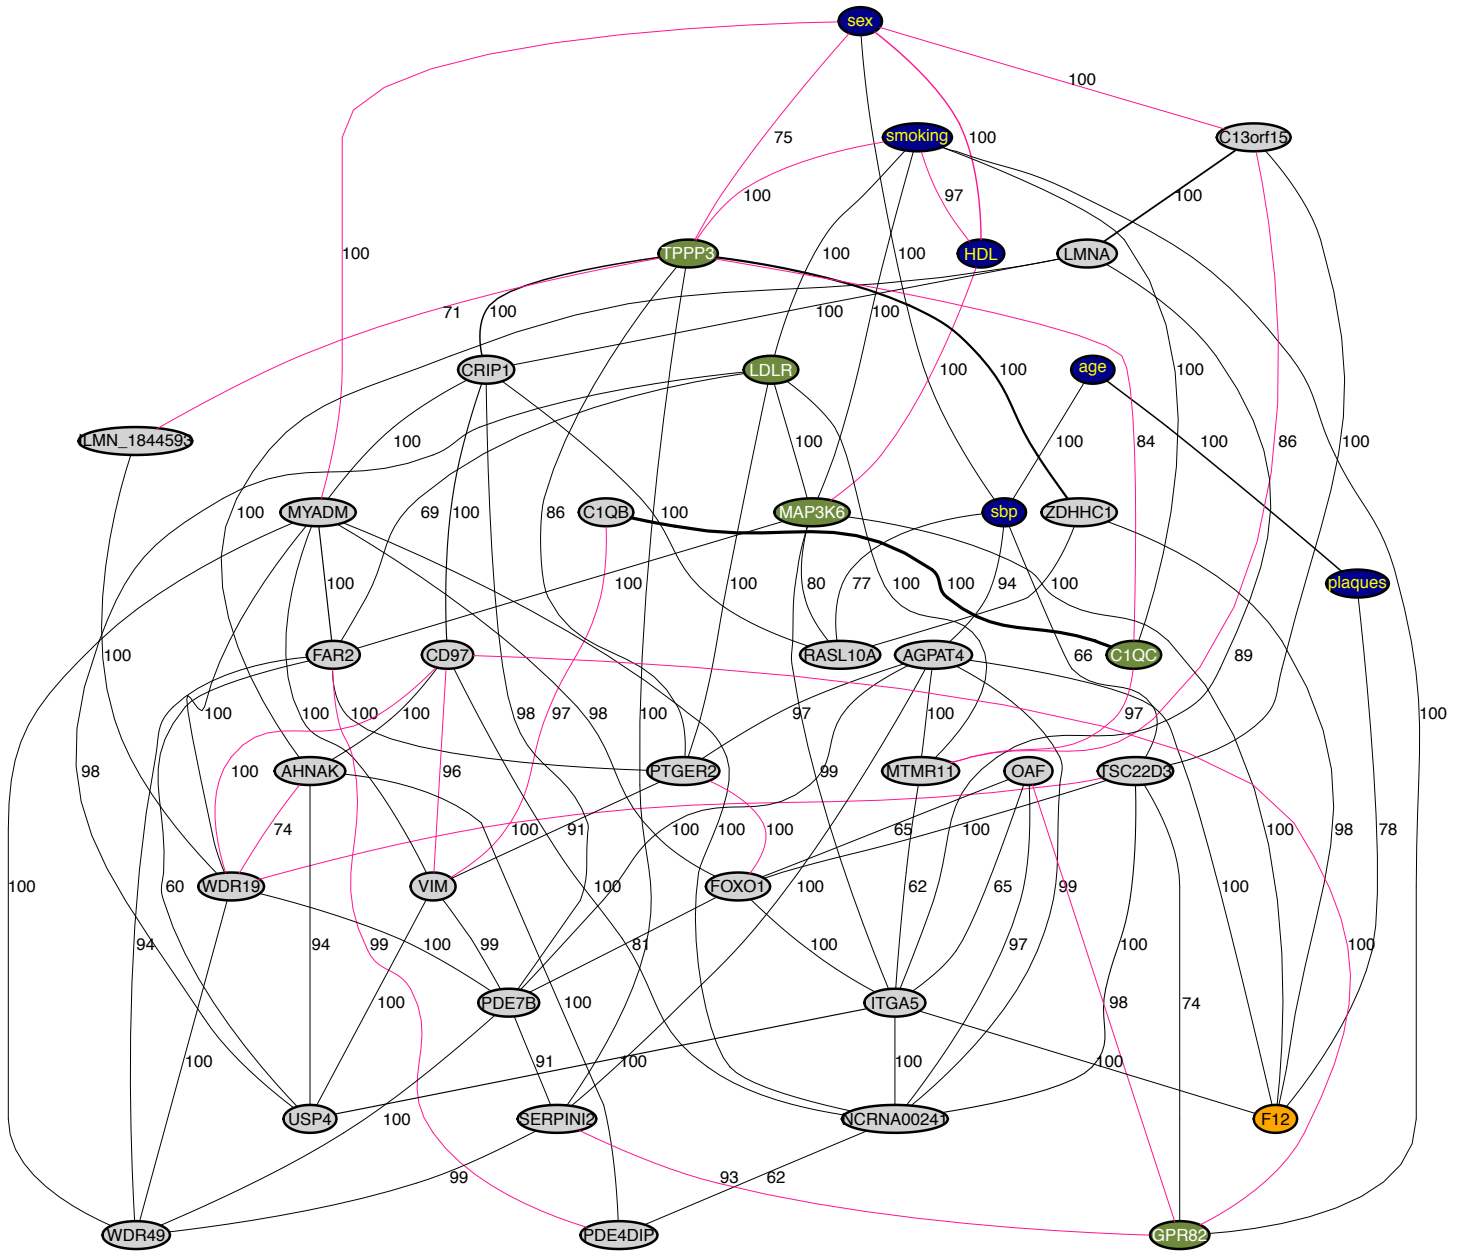



# Network Skeleton for Pattern 51

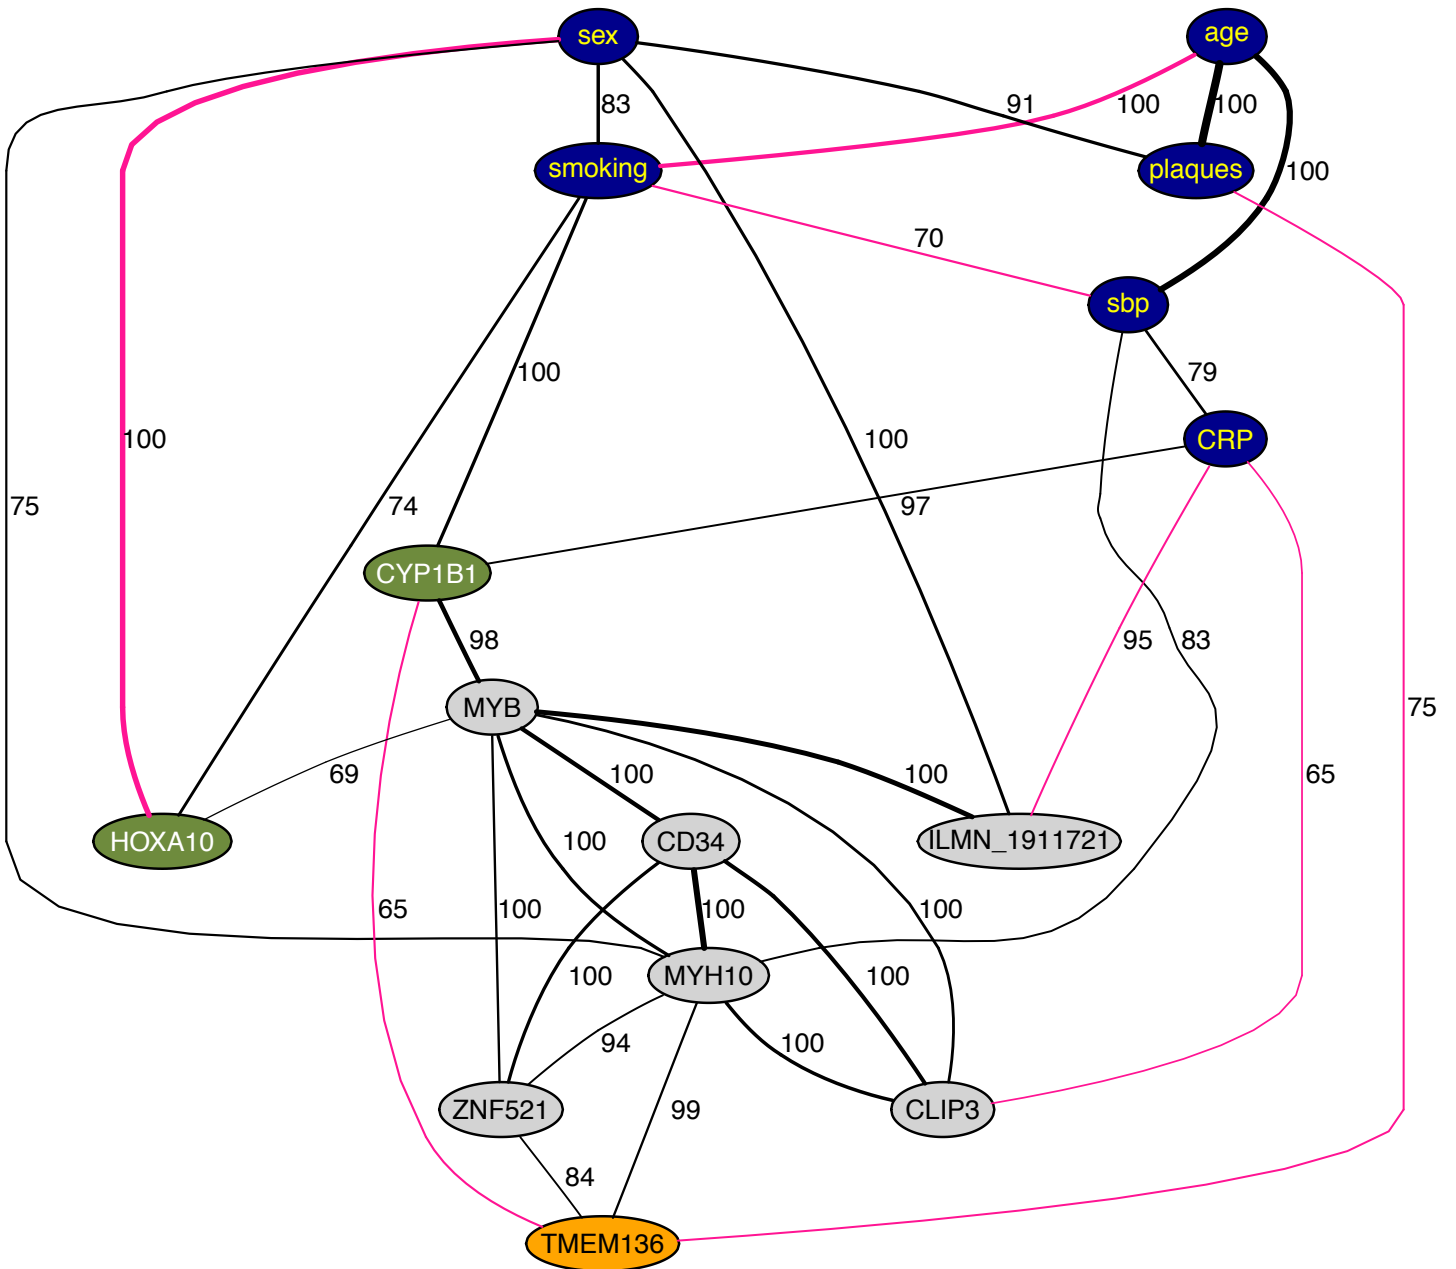

# Network Skeleton for Pattern 52

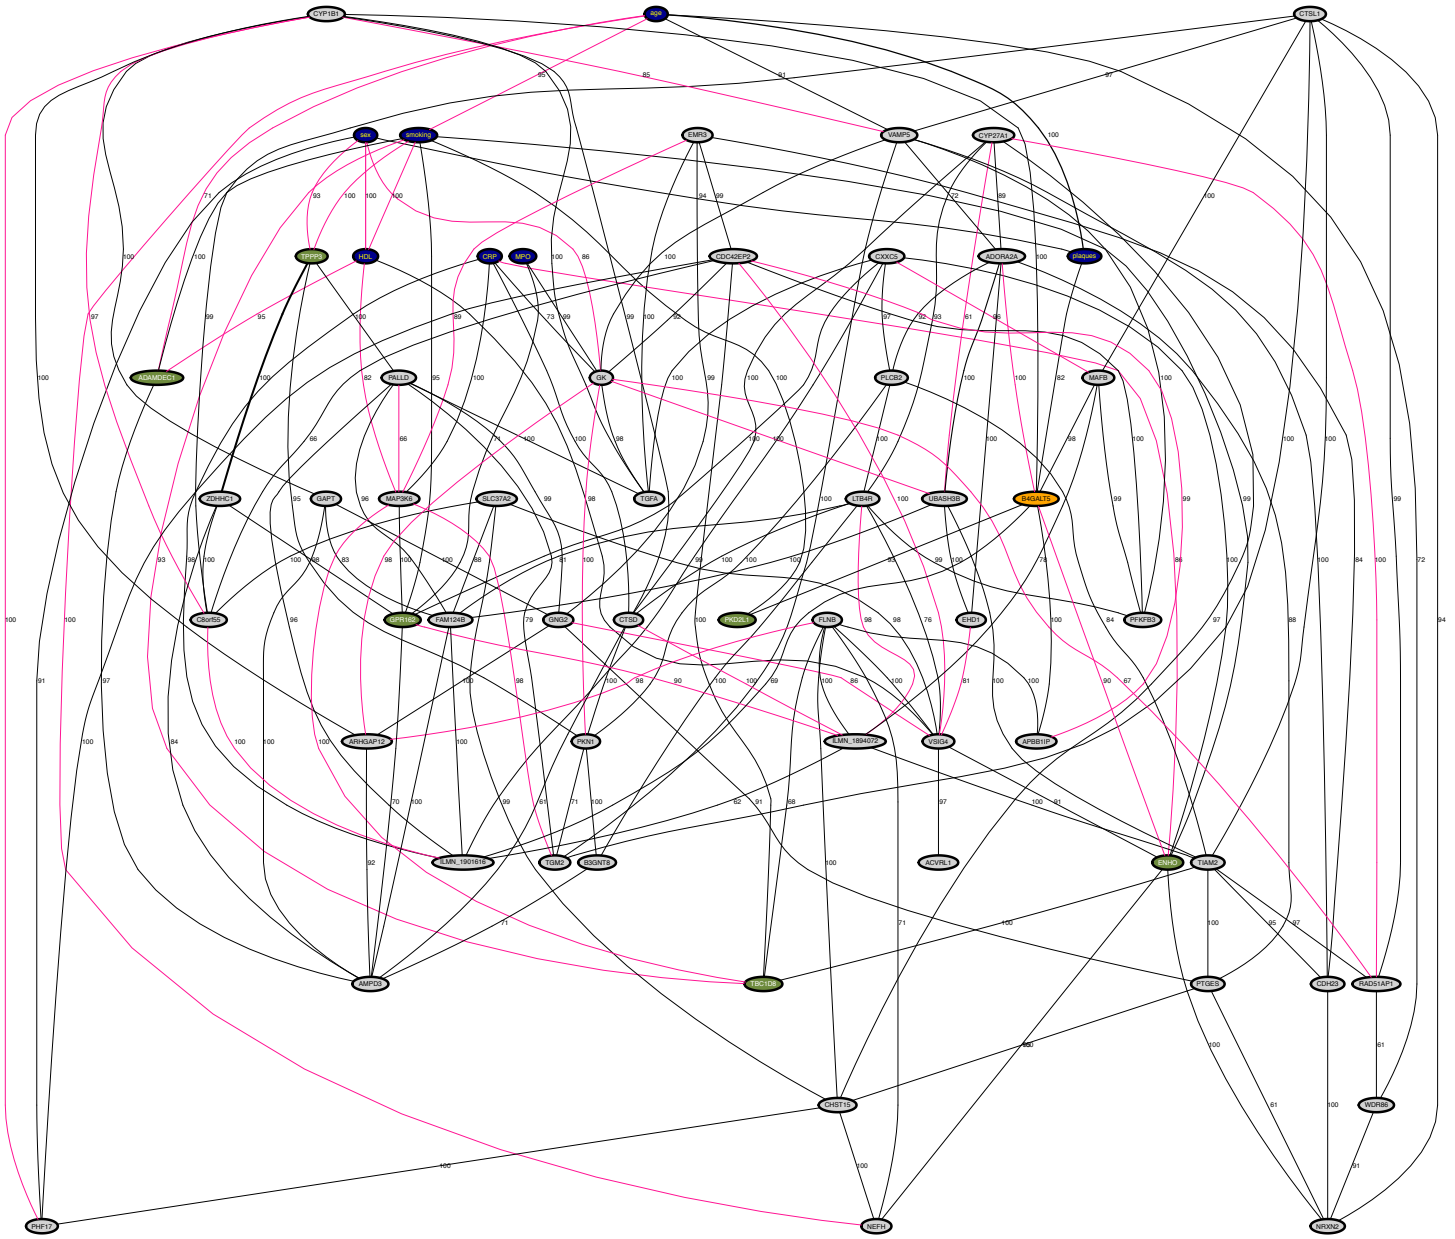

## Network Skeleton for Pattern 54

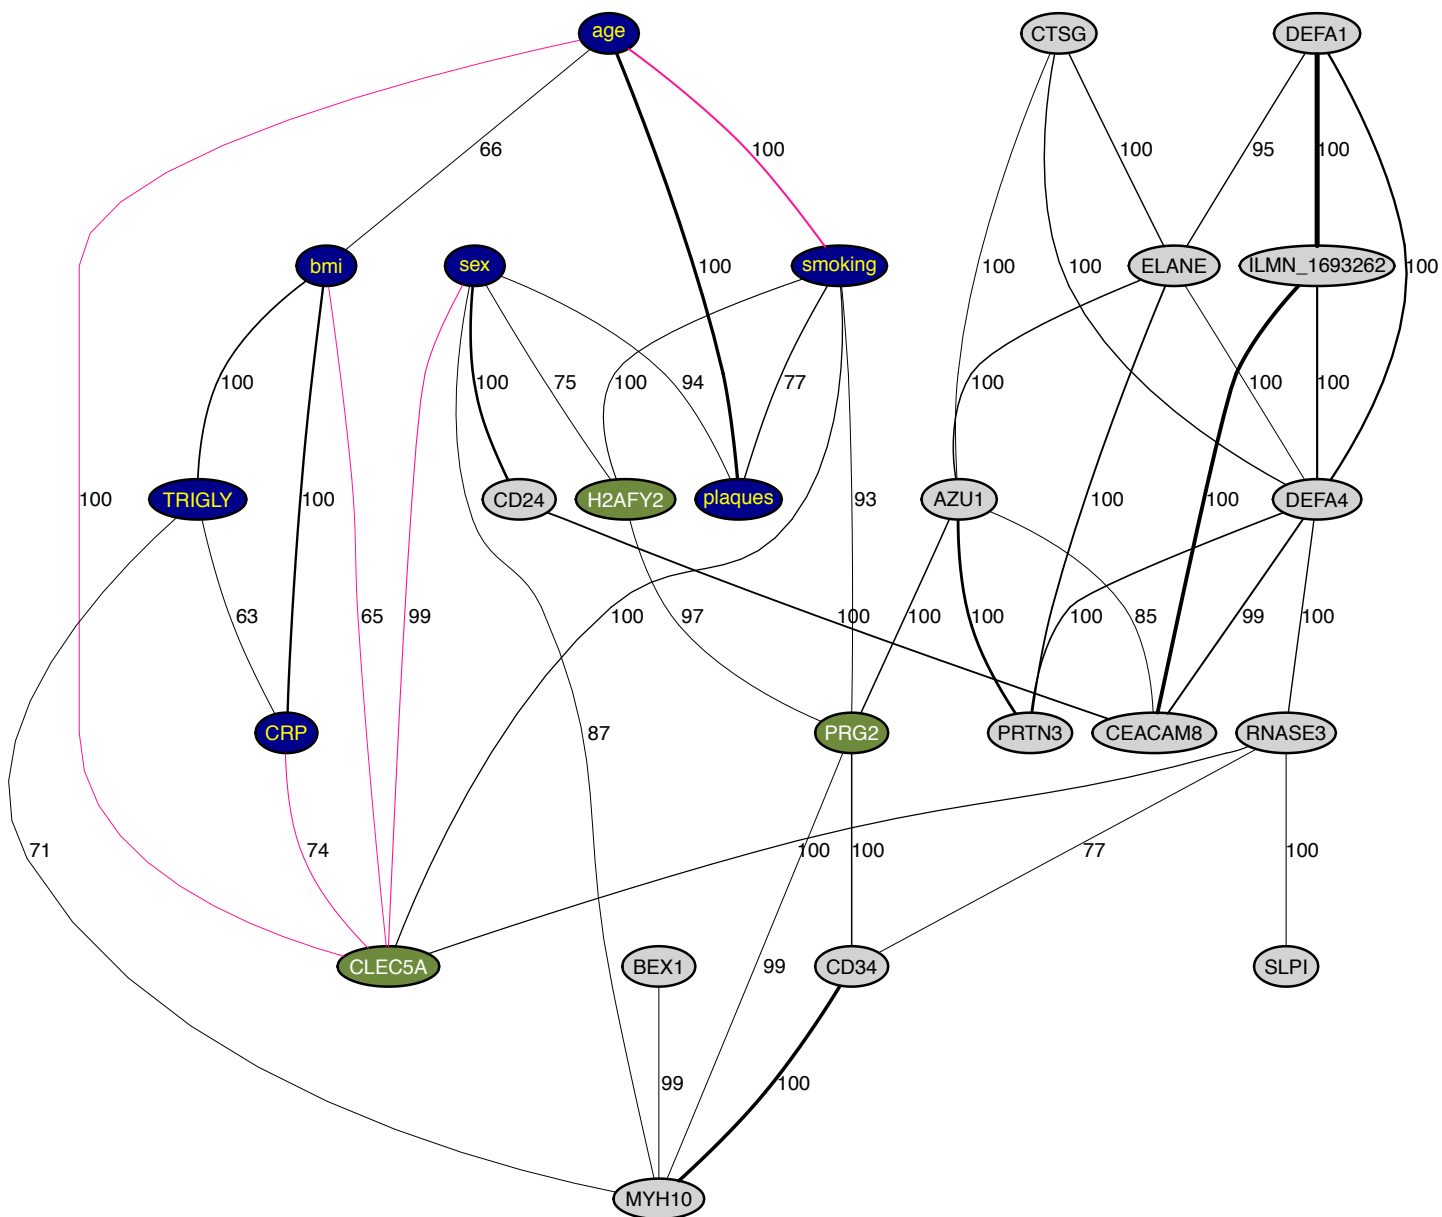

# Network Skeleton for Pattern 58

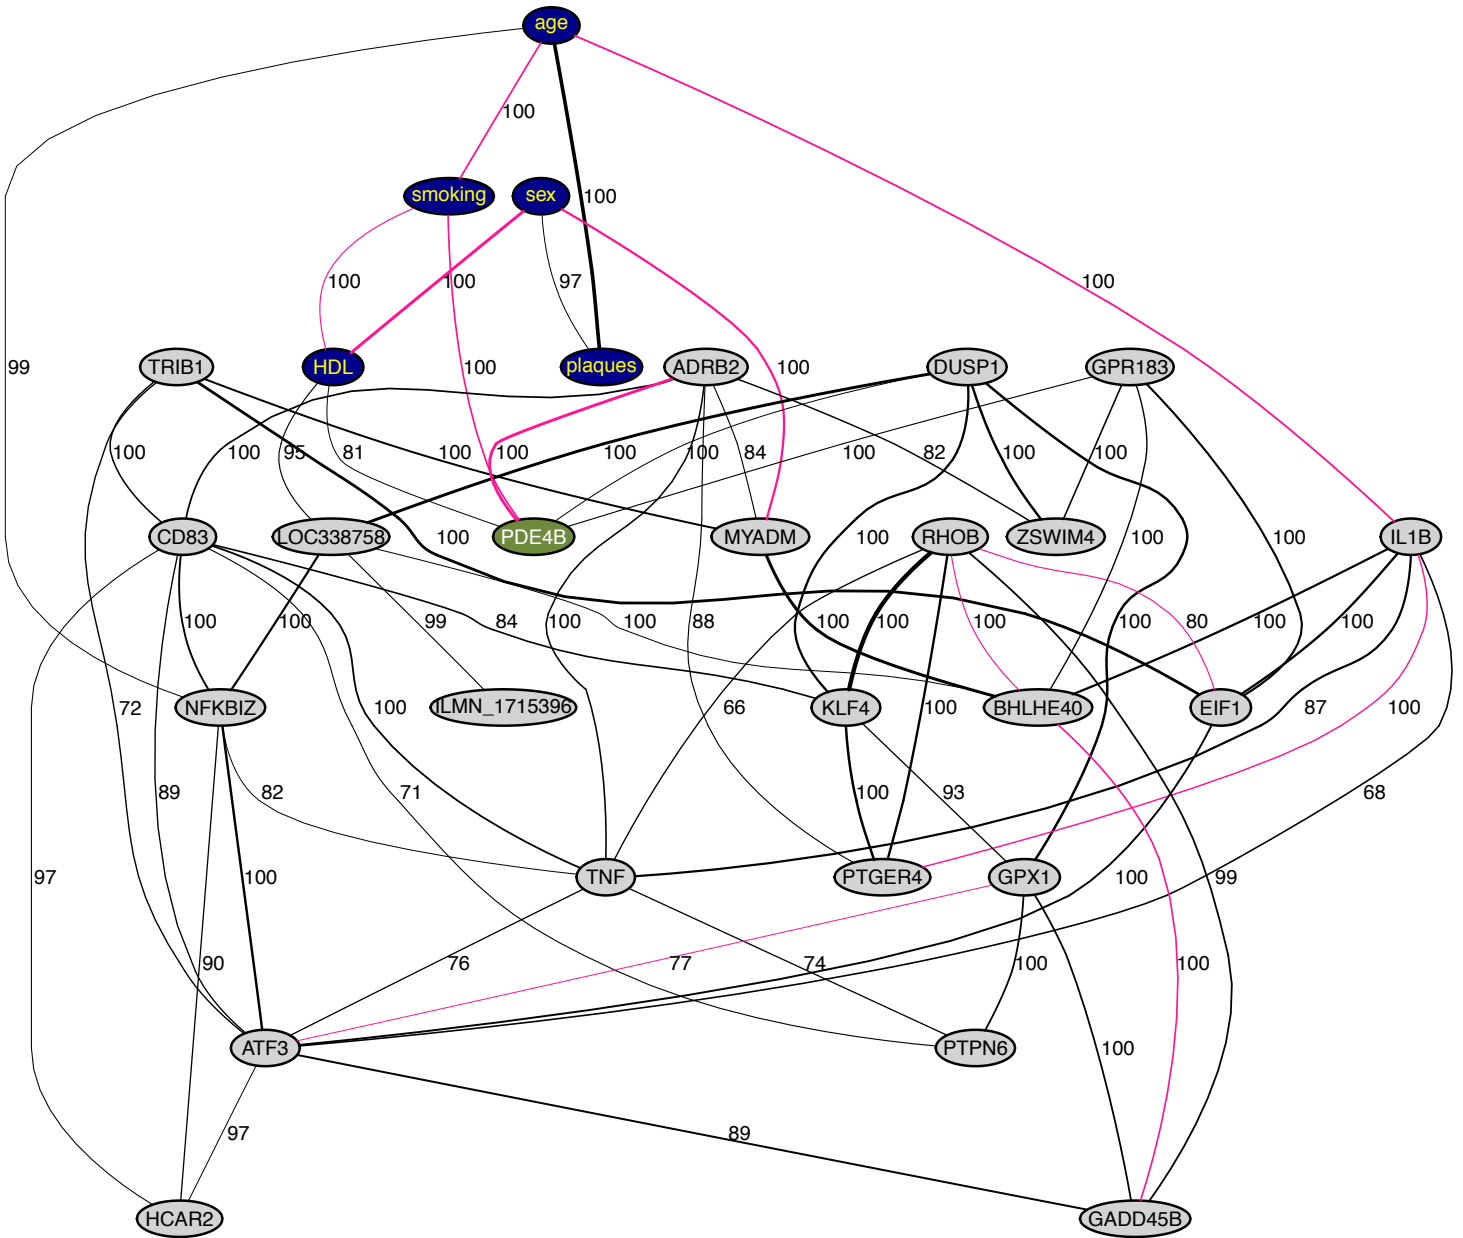

Supplement: pone.0050888.s017.pdf [file pone.0050888.s017.pdf]
